1 On the flexibility of the cellular amination network in *E. coli*

2 Helena Schulz-Mirbach<sup>1</sup>, Alexandra Müller<sup>1</sup>, Tong Wu<sup>1</sup>, Pascal Pfister<sup>2</sup>, Selçuk Aslan<sup>1</sup>, Lennart Schada von  
3 Borzyskowski<sup>2,3</sup>, Tobias J. Erb<sup>2,4</sup>, Arren Bar-Even<sup>1</sup>, Steffen N. Lindner<sup>1,5,\*</sup>

4  
5 <sup>1</sup> Max Planck Institute of Molecular Plant Physiology, Am Mühlenberg 1, 14476 Potsdam, Germany.

6 <sup>2</sup> Max Planck Institute for Terrestrial Microbiology, Karl-von-Frisch-Str. 10, D-35043 Marburg, Germany

7 <sup>3</sup> Institute of Biology Leiden, Leiden University, Sylviusweg 72, 2333 BE Leiden, The Netherlands.

8 <sup>4</sup> Center for Synthetic Microbiology (SYNMIKRO), Karl-von-Frisch-Str. 16, D-35043 Marburg, Germany

9 <sup>5</sup> Department of Biochemistry, Charité Universitätsmedizin, Virchowweg 6, 10117 Berlin, Germany

10

11 \* Corresponding author:

12 Steffen N. Lindner; email: [lindner@mpimp-golm.mpg.de](mailto:lindner@mpimp-golm.mpg.de); Phone: +49-(0)331-5678149

13

14 Running title: Flexibility of the amination network

15 Keywords: ammonium fixation, glutamate, glutamate auxotroph, ammonium assimilation auxotroph,  
16 synthetic ammonium assimilation, AspC, transaminase, amination network, *E. coli*

17 Character count: 77.600 (without spaces)

18

19 **Abstract**

20 Ammonium (NH<sub>4</sub><sup>+</sup>) is essential to generate the nitrogenous building blocks of life. It gets assimilated via the  
21 canonical biosynthetic routes to glutamate and is further distributed throughout metabolism via a network of  
22 transaminases. To study the flexibility of this network, we constructed an *Escherichia coli* glutamate  
23 auxotrophic strain. This strain allowed us to systematically study which amino acids serve as amine source  
24 and found that several amino acids complement the auxotrophy, either by producing glutamate via  
25 transamination reactions or by their conversion to glutamate. In this network, we identified aspartate  
26 transaminase AspC as a major connector between many amino acids and glutamate. Additionally, we  
27 extended the transaminase network by the amino acids β-alanine, alanine, glycine and serine as new amine  
28 sources and identified D-amino acid dehydrogenase (DadA) as an intracellular amino acid sink removing  
29 substrates from transaminase reactions. Finally, ammonium assimilation routes producing aspartate or  
30 leucine were introduced. Our study reveals the high flexibility of the cellular amination network, both in terms  
31 of transaminase promiscuity and adaptability to new connections and ammonium entry points.

32

33

## 34 Introduction

35 Nitrogen is essential for all forms of life, as it is part of 75 % of the cells building blocks (mainly in proteins and  
36 nucleic acids) (Milo & Phillips, 2015). The conversion of atmospheric dinitrogen ( $N_2$ ) to ammonia ( $NH_3$ ) by  
37 diazotrophic bacteria or industrially by the Haber–Bosch process is essential to make it available for the  
38 assimilation by plants and other organisms to produce nitrogenous compounds.

39 While carbon fixation has evolved several times, resulting in versatile naturally occurring ways of carbon  
40 fixation (Löwe & Kremling, 2021), the introduction of ammonium ( $NH_4^+$ , protonated form of ammonia) into the  
41 building blocks of life is similar in all organisms and limited to the fixation of ammonium at the node between  
42 2-oxoglutarate, glutamate and glutamine (Fig. 1). Here, three cooperating canonical enzymes assimilate  
43 ammonium in two distinct ways. In the first reaction, glutamate is the direct product of glutamate  
44 dehydrogenase (*gdhA*, GDH). In the second pathway, the combined activity of glutamine synthetase (*glnA*,  
45 GS) and glutamate synthase (Glutamine 2-oxoglutarate aminotransferase, *gltBD*, GOGAT) fix another  
46 ammonium and convert glutamate into glutamine, which then donates one amine to 2-oxoglutarate to form  
47 two glutamate molecules (Helling, 1994; Kumar & Shimizu, 2010) (Fig. 1). In order to make all essential amino  
48 acids and other aminated compounds, glutamate and glutamine then donate their amines to specific keto  
49 acids or other amino acid precursors in reversible transferase reactions. As ammonium enters metabolism  
50 solely via these two routes, all cellular nitrogen is provided by either glutamate (75%) or glutamine (25%)  
51 (Yang et al, 2018).

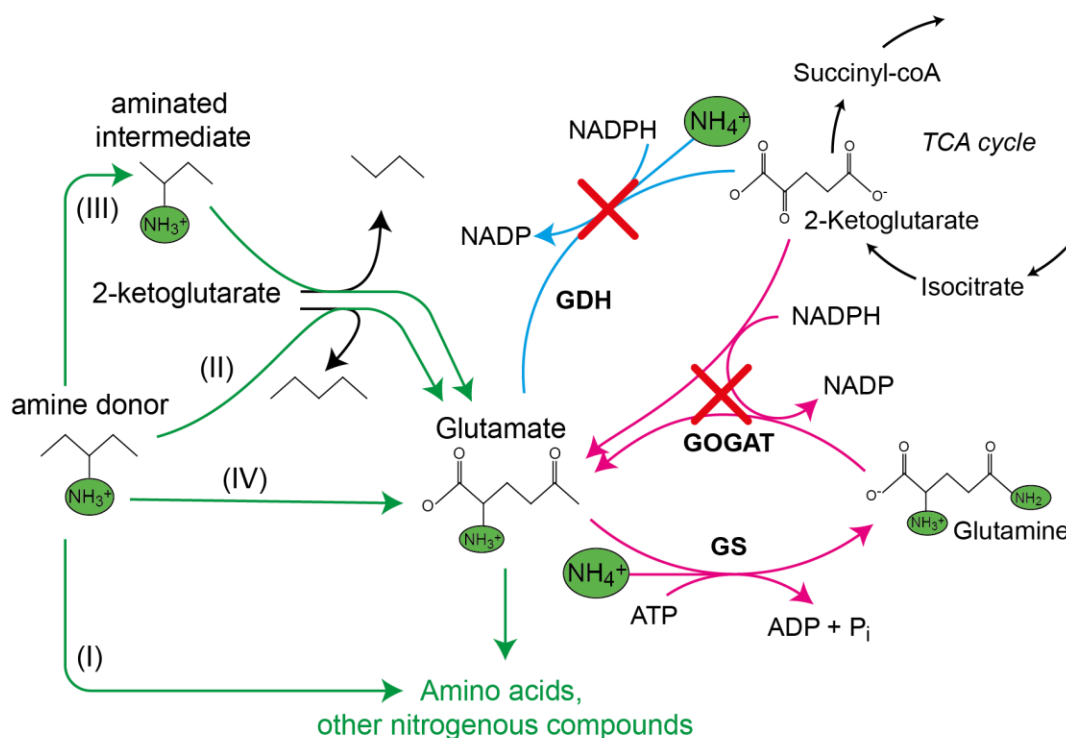

52

53 **Figure 1: Canonical ammonium assimilation via glutamate dehydrogenase (GDH) (blue arrow) or glutamine**  
54 **synthetase (GS) and glutamine 2-oxoglutarate aminotransferase (GOGAT) (pink arrows).** One pathway for  
55 ammonium assimilation is the amination of the TCA cycle intermediate 2-ketoglutarate by GDH to form glutamate (blue  
56 arrow). A second pathway requires joint action of GS and GOGAT, which first aminate glutamate to form glutamine (GS),  
57 which donates one amine to 2-ketoglutarate (GOGAT) to form two glutamate molecules, which further provide amines  
58 (green) for biosynthesis of amino acids and other nitrogenous compounds (pink arrows). Growth of the glut-aux strain  
59 deleted in GDH and GOGAT (red crosses) by a supplemented amine source is possible via the following mechanism.  
60 The amine donor either (I) replaces glutamate as amine source for production of amino acids and nitrogenous  
61 compounds, (II) donates an amine to 2-ketoglutarate to form glutamate, (III) is converted to an intermediate donating an  
62 amine to 2-ketoglutarate or (IV) is metabolically converted into glutamate. Green arrows indicate these cases.

63

64 Besides the glutamate biosynthesis node, alternative entry points for ammonium theoretically exist, e.g.  
65 alanine dehydrogenase or aspartate ammonia lyase, but these are not relevant for ammonium assimilation  
66 (Kim & Hollocher, 1982). Evolution has developed a system for ammonium assimilation which is controlled by  
67 its intracellular availability. The ATP investment driving GS activity makes amination reactions favorable even  
68 at low ammonium concentrations. Additionally, most of the GS orthologues have evolved kinetic parameters  
69 optimized for lower ammonium concentrations with an apparent  $K_M$  of 0.1 mM for ammonium (Reitzer, 2014).  
70 At high ammonium concentrations, the NADPH dependent (and thus energetically cheaper) GDH allows more  
71 efficient ammonium assimilation than GS (Reitzer, 2014). This metabolic switch might explain the prominence  
72 of glutamate-based ammonium assimilation as opposed to other ammonia entry points in nature. To generate  
73 the NADPH required for GDH, *Escherichia coli* mostly uses the membrane-bound proton-translocating  
74 transhydrogenase (PntAB) (Sauer et al, 2004). This enzyme exploits the proton motif force to drive proton  
75 translocation from NADH to NADP<sup>+</sup> (Spaans et al, 2015), and thereby indirectly competes with ATP synthesis.  
76 Therefore, when growing under high ammonium concentrations, growth of this microorganism might benefit  
77 from ammonium assimilation via NADH dependent dehydrogenases.

78 Following these thoughts, we tried to assess if alternative routes for ammonium assimilation can arise from  
79 the metabolic network of *E. coli*. For this purpose, we systematically investigated the flexibility of the amination  
80 network in a glutamate auxotrophic -and hence ammonium assimilation deficient- *E. coli* strain. This study  
81 provides fundamental knowledge on the plasticity of ammonium metabolism in *E. coli* and moreover  
82 addresses industrial interests by providing a versatile bacterial *chassis* for screening and optimization of  
83 ammonium assimilation and transamination reactions.

84

## 85 **Results**

### 86 **Only some amino acids serve as amine source.**

87 To study the flexibility of *Escherichia coli*'s cellular amination network, we first generated a strain in which both  
88 canonical ammonia assimilation routes are disrupted. Accordingly, we deleted the genes encoding GDH  
89 (*gdhA*) and GOGAT (*gltBD*), which are responsible for 2-oxoglutarate amination under high and low ammonia

90 concentrations, respectively (Helling, 1994; Kumar & Shimizu, 2010) (Fig. 1). The resulting glutamate  
91 auxotrophic strain (glut-aux,  $\Delta gdhA \Delta gltBD$ ) was not able to grow in minimal medium with ammonia as sole  
92 nitrogen source unless an amine group donor like glutamate was provided in the medium (Fig. 2). Initially, we  
93 were interested in testing whether other amino acids can replace glutamate as an amine source allowing  
94 growth of the glut-aux. We therefore characterized growth of the glut-aux strain when supplemented with one  
95 of the proteinogenic or naturally occurring non-proteinogenic amino acids (ornithine and  $\beta$ -alanine). We note  
96 that this growth experiment is different from the experiments commonly described in literature, where amino  
97 acids were added to the medium without ammonia to serve as sole nitrogen source (Neidhardt et al, 1996).  
98 In these experiments, the metabolic degradation of the amino acids to release ammonia suffices to enable  
99 growth. Conversely, for the glut-aux strain, growth complementation through the supplemented amino acids  
100 as amine source must follow one of these options: (i) replace glutamate as an amine donor for the production  
101 of other nitrogenous compounds; (ii) donate their amine group to 2-oxoglutarate to generate glutamate as an  
102 amine; (iii) be metabolically converted to compounds that can donate their amine group to 2-oxoglutarate; or  
103 (iv) be metabolically converted to glutamate (Fig. 1). In the former three cases, the amination network of the  
104 cell needs to be flexible enough to adapt to different directionalities of at least some of the transamination  
105 reactions. As utilization of amino acids as amine group donors in the glut-aux strain might be dependent on  
106 the nitrogen regulated (Ntr) response (Reitzer, 2003), we performed growth experiments with and without  
107 ammonia in the medium (light blue and magenta lines in Fig. 2). As a control, we repeated the classical  
108 experiments of testing each amino acid as sole nitrogen source with a wild type strain. Here, amino acids are  
109 not required to directly donate their amine group but can rather support growth by releasing ammonia through  
110 their degradation (black lines in Fig. 2).

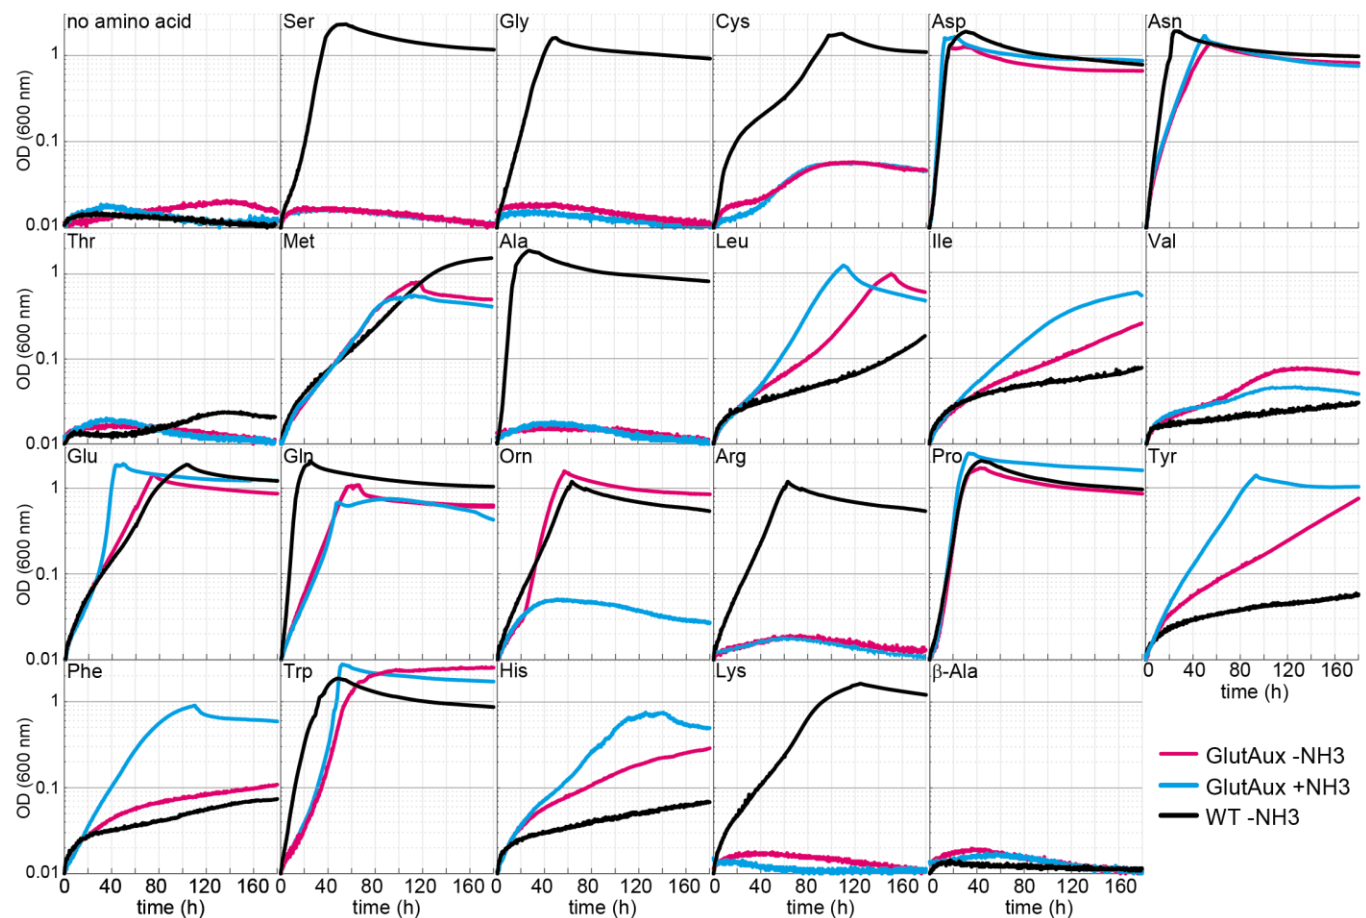

111

112 **Figure 2: Identification of amino acids which rescue growth of the glut-aux strain.** The glut-aux strain was grown  
 113 in M9 medium with (blue line) or without ammonium (magenta line) and 20 mM glycerol as carbon source. *E. coli* WT  
 114 was grown in M9 medium without ammonium (black line) and 20 mM glycerol as carbon source. 5 mM of the indicated  
 115 amino acids or no amino acid as negative control were supplemented to test if they can serve as an amine source (glut-  
 116 aux strain) or an ammonium source (WT). Data shows representative growth as observed from triplicate repeats with  
 117 errors < 5 %.

118 We found that only some amino acids rescue growth of the glut-aux strain (Fig. 2). This generally correlated  
 119 with the existence of known transaminase enzymes that enable glutamate production from the respective  
 120 amino acids in *E. coli*. For example, aspartate, leucine, and tyrosine serving as cellular amine donor for  
 121 glutamate generation from 2-oxoglutarate could be attributed to the activity of aspartate transaminase (AspC),  
 122 tyrosine transaminase (TryB), and branched-chain-amino-acid transaminase (IlvE) (Gelfand & Steinberg,  
 123 1977). As these transaminases display considerable cross reactivity (Gelfand & Steinberg, 1977; Inoue et al,  
 124 1988), each of these three amino acids might support the production of the others directly, without the need  
 125 for glutamate as an amine donor. However, glutamate here still likely serves as the primary amine donor for  
 126 most cellular nitrogenous compounds (Yang et al, 2018). Hence, AspC, TryB, and IlvE must also be fully  
 127 reversible under physiological conditions to aminate 2-oxoglutarate to glutamate. While transaminases are  
 128 generally reversible enzymes, their ability to effectively operate reversibly *in vivo* is not trivial as the  
 129 [glutamate]/[2-oxoglutarate] ratio is very high (above 100) under physiological conditions (Bennett et al, 2009),

130 making the reverse amine transfer onto 2-oxoglutarate to form glutamate thermodynamically challenging.  
131 Since the glut-aux strain grew with several amino acids as amine source, we conclude that the cellular  
132 amination network must be sufficiently flexible to accept amine sources other than glutamate despite the  
133 potential thermodynamic barriers.

134 To prove amine transfer from the provided amino acids, we cultivated the glut-aux strain with 5 mM of one of  
135 five (unlabeled) representative amino acids that can serve as an amine donor – glutamate, proline, aspartate,  
136 tryptophan, and leucine – in a medium containing 20 mM  $^{15}\text{N}$ -ammonium. We subsequently measured the  $^{15}\text{N}$   
137 labeling in proteinogenic amino acids (Methods) and found that most of them were completely unlabeled  
138 (Fig. 3A), confirming that their amine group was transferred from the amino acid rather than from free ( $^{15}\text{N}$ -  
139 labeled) ammonia in the medium (Fig. 3B). Arginine was once labeled (R, Fig. 3), as one of its nitrogen atoms  
140 originates from the amide nitrogen of glutamine that is derived from ammonia fixed by GS activity (Fig. 3B).  
141 Overall, these results confirm that the amino acids added to the medium were the only amine sources allowing  
142 growth of the glut-aux strain, rather than allowing amination of amino acid derived backbones with free  
143 ammonium in the medium.

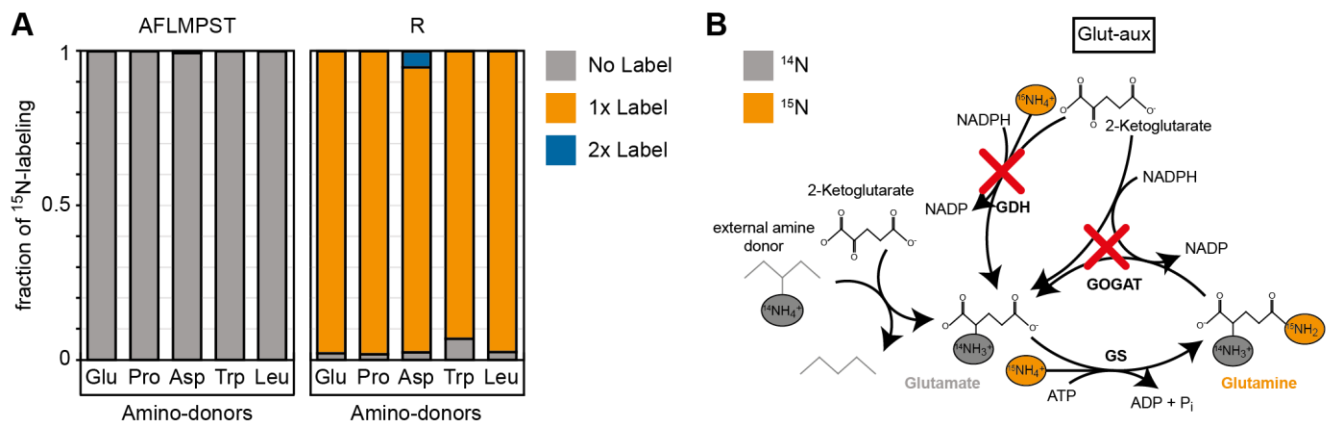

144

145 **Figure 3:  $^{15}\text{N}$ -labeling confirms amine assimilation from supplied amino acid in the glut-aux strain.** **A** The glut-  
146 aux strain was incubated in  $^{15}\text{N}$ - $\text{NH}_3\text{Cl}$  M9 medium with 20 mM glycerol as carbon source.  $^{15}\text{N}$  labeling pattern in analyzed  
147 proteinogenic amino acids (single letter code) upon feeding with 5 mM of unlabeled amino acids glutamate, proline,  
148 aspartate, tryptophan, or leucine as amine-donors (three letter code). The labeling pattern of the amino acids A, F, L, M,  
149 P, S and T were identical with supplied amino acids and hence only a representative dataset is shown. Data represents  
150 means of triplicate measurements with errors < 5 %. **B** Schematic presentation of expected ammonium incorporation in  
151 glut-aux grown on M9 with  $^{15}\text{N}$ - $\text{NH}_3\text{Cl}$  with 20 mM glycerol as carbon source and an unlabeled amino acid as ammonium  
152 source. Since the genes encoding GDH and GOGAT are deleted in the glut-aux (red crosses), the glut-aux thus relies  
153 on the provided amino acid for biosynthesis of unlabeled (grey) glutamate. During glutamine biosynthesis, the glut-aux  
154 assimilates  $^{15}\text{N}$ - $\text{NH}_3\text{Cl}$  to form once labelled glutamine and thus once labelled arginine.

155

156 To further validate that growth of the glut-aux strain is limited by the supply of amine groups through the amino  
157 acids provided in the medium we cultivated it using different concentrations of amino acids (Fig. 4). As

158 expected, we found that biomass yield, as indicated by the maximal OD<sub>600</sub>, directly correlated with the  
159 concentration of the supplemented amino acid. All amino acids showed the same dependency of biomass  
160 yield on concentration, with the exception of ornithine, which supported roughly double the yield for each  
161 concentration. This is in line with the fact that both amine groups from ornithine can be donated to aminate 2-  
162 oxoglutarate to glutamate (Prieto-Santos et al, 1986). As this ornithine degradation pathway is induced by  
163 nitrogen starvation (Schneider et al, 2013; Schneider & Reitzer, 2012), growth of the glut-aux strain with  
164 ornithine as amine group donor was observed only when ammonia was omitted in the medium. The correlation  
165 of maximal OD<sub>600</sub> to amino acid concentration confirms that amine supply from the amino acid limits biomass  
166 yield in the glut-aux strain in the same manner for all tested amino acids. To our surprise glutamate was not  
167 the amine donor supporting fastest growth of the glut-aux strain. Even proline, which in order to donate its  
168 amine group needs to be converted to glutamate, supported faster growth (Fig. 4). This, together with the fact  
169 that the growth rate increased proportionally with the glutamate concentration indicates that glutamate uptake  
170 is limiting growth of the glut-aux strain.

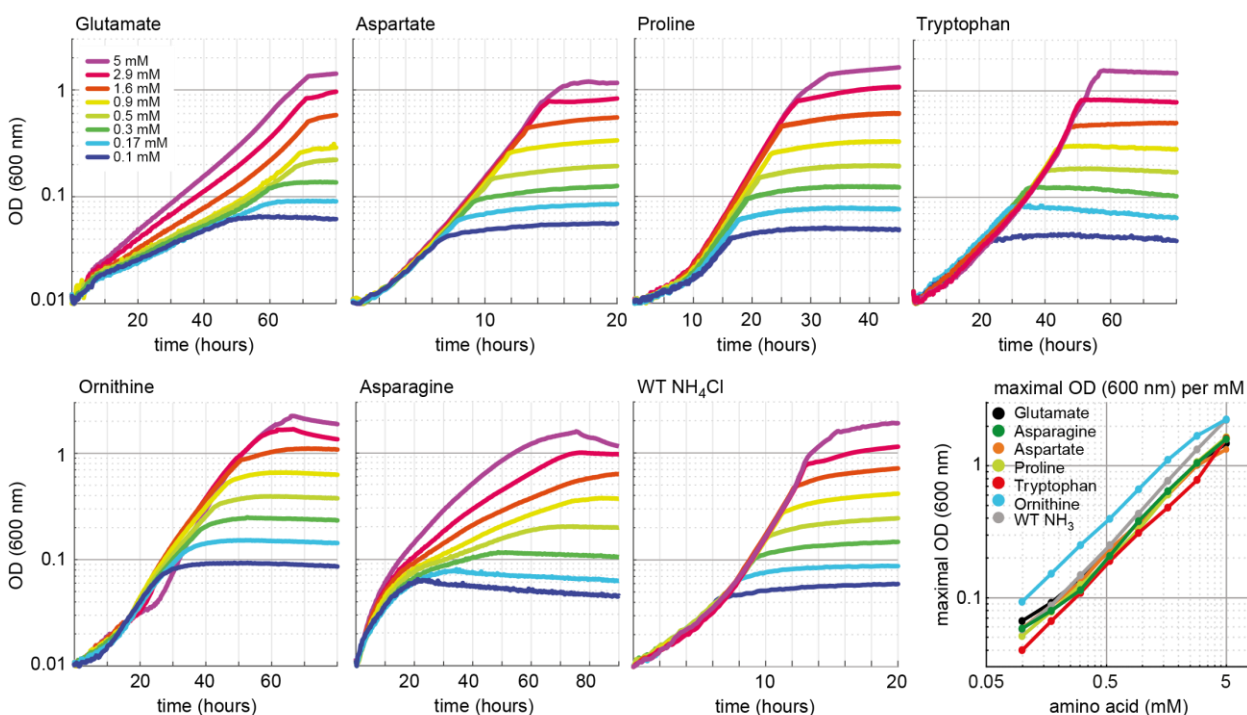

171

172 **Figure 4: Growth dependency of the glut-aux strain on amino acid concentration.** Cells were grown in ammonium  
173 free M9 medium with 20 mM glycerol and the indicated concentrations of the amino acids glutamate, aspartate, proline,  
174 tryptophan, ornithine and asparagine. As a comparison WT was grown in ammonium free M9 medium with 20 mM  
175 glycerol but with NH<sub>4</sub>Cl concentrations similar to the amino acid concentrations used. Data shows representative growth  
176 as observed from triplicate repeats with errors < 5 %.

177

178 **The cellular amination network is highly promiscuous.**



179 To investigate the contribution of different enzymes to the use of amino acids as amine source, we decided  
180 to analyze effects of several gene deletions. We specifically deleted genes encoding proteins essential for the  
181 certain degradation pathways allowing glutamate formation based on available documentation in the database  
182 Ecocyc (Keseler et al, 2021). First, we explored use of proline as amine source (Fig. 2). We did not expect  
183 this amino acid to donate its amine group directly, but rather to be metabolized by PutA, encoding for a  
184 bifunctional flavoenzyme with proline dehydrogenase and 1-pyrroline-5-carboxylate dehydrogenase activities  
185 (Moxley et al, 2014), to glutamate (Frank & Ranhand, 1964) which would serve as an amine donor. Indeed,  
186 upon deletion of *putA* growth of the WT and of the glut-aux strain on proline as sole ammonium source was  
187 abolished (Fig. 5A). This confirmed that proline could only support growth via its native degradation pathway  
188 and was unable to serve as amine source via a different pathway. We then focused on amino acids that are  
189 expected to directly donate their amine groups. For example, methionine, which could serve as an amine  
190 donor, was previously found to be the main substrate for only a single transaminase: YbdL (Dolzan et al,  
191 2004). However, deletion of *ybdL* in the  $\Delta$ *gdhA*  $\Delta$ *gltBD* strain did not affect growth with methionine as amine  
192 donor (Supplementary Fig. S1), suggesting that the physiological contribution of this transaminase to the use  
193 of methionine as amine source is negligible. YbdL was also shown to be the only transaminase able to  
194 efficiently accept histidine and phenylalanine (Dolzan et al, 2004; Inoue et al, 1988). Yet, the glut-aux  $\Delta$ *ybdL*  
195 strain did not show any growth retardation when using histidine or phenylalanine as amine donor  
196 (Supplementary Fig. S1). Indeed, other transaminases are known to accept methionine and histidine, albeit  
197 at a substantially lower affinity and rate than their primary substrate, e.g., aspartate transaminase, tyrosine  
198 transaminase, and branched-chain-amino-acid transaminase (Inoue et al, 1988; Mavrides, 1987; Powell &  
199 Morrison, 1978). It therefore seems that the promiscuity of such transaminases enables effective use of  
200 methionine as amine donor even in absence of the enzyme preferring it as substrate.

201 To further investigate the relevance of promiscuous transaminase activities for using external amine donors,  
202 we focused on AspC. This transaminase is known to accept a range of amino acids. After constructing the  
203 glut-aux  $\Delta$ *aspC* strain, its growth was analyzed on all previously tested 22 amino acids. We found the glut-  
204 aux  $\Delta$ *aspC* strain to be unable to grow with histidine, tyrosine, phenylalanine, tryptophan, methionine,  
205 isoleucine and leucine as amine donors, which all allowed growth of the glut-aux strain (grey lines in Fig. 5B,  
206 Fig. 2). This demonstrates promiscuity of AspC and reveals that, in its physiological context, this transaminase  
207 is even more versatile than previously reported. Although AspC had shown low specific transaminase activity  
208 with histidine, methionine, isoleucine and leucine *in vitro* (Hayashi et al, 1993), our experiments suggest,  
209 however, that the enzyme is essential for utilization of these amino acids as amine donors *in vivo*.  
210 Furthermore, TyrB and IlvE, which had shown higher specific *in vitro* activities with tyrosine, phenylalanine  
211 and tryptophan compared to AspC (Hayashi et al, 1993), apparently did not complement the AspC deletion.

212

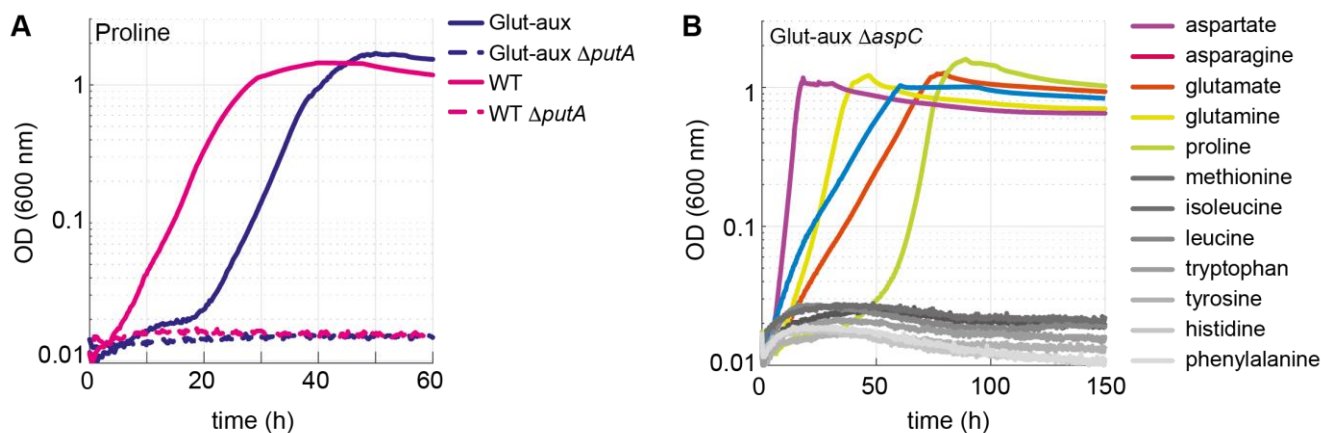

213

214 **Figure 5. Proline is converted to glutamate to serve as an amine source. AspC is responsible for the utilization**  
215 **of several amino acids. A** Deletion of *putA* abolished growth with proline as an amine source in the glut-aux strain and  
216 as a nitrogen source in the WT. **B** Deletion of *aspC* eliminates growth of the glut-aux with methionine, leucine, isoleucine,  
217 histidine, tyrosine, tryptophan and phenylalanine as amine donor (grey lines). Experiments were carried out in M9  
218 w/ammonium containing 20 mM glycerol and 5 mM of the indicated amine sources. Data represents means of triplicates  
219 with < 5 % variation.

220

### 221 **Engineering utilization of alanine as amine donor.**

222 Despite the presence of two glutamate producing alanine transaminases (AlaA, AlaC) as well as multiple  
223 transaminases that can promiscuously accept alanine (Kim et al, 2010; Pena-Soler et al, 2014), alanine did  
224 not serve as amine donor for the glut-aux strain, regardless of the presence or absence of ammonia in the  
225 medium (Fig. 2). Even upon overexpression of the alanine transaminase isozymes AlaA and AlaC, no growth  
226 with alanine as amine donor was observed (Fig. 6A). Thus, we employed adaptive laboratory evolution to  
227 enable the glut-aux strain to use alanine as an amine donor. We incubated the glut-aux strain with and without  
228 overexpression of either AlaA or AlaC on 20 mM glycerol + 5 mM alanine. After two weeks of incubation the  
229 glut-aux cultures overexpressing AlaA had grown to an  $OD_{600} > 1$ , while the cultures which did not overexpress  
230 any alanine transaminases had not grown at all. The grown cultures were used to isolate single colonies,  
231 which upon transfer to M9 medium with 20 mM glycerol and 5 mM alanine grew immediately, indicating that  
232 indeed mutations allowed their growth (Fig. 6A). To analyze which genetic differences are present in the  
233 evolved strains, we sent two of the independently obtained isolates and the parent strain for genome  
234 sequencing. Analysis of the genome sequencing results revealed that both isolates had mutations in the  
235 alanine racemase gene *dadX* (Supplementary Table S1, Supplementary Figure S2), either a duplication of a  
236 27 bp region from nucleotide 151 to nucleotide 177 (mutant 1) or a 1 bp deletion at nucleotide position 821  
237 (of the 1071 nucleotide gene) (mutant 2). In both cases the mutations resulted in a frameshift, indicating a  
238 loss of function of DadX. Alanine racemase diverts flux from L-alanine to D-alanine which is either used for  
239 cell wall biosynthesis (Walsh, 1989) or degraded to pyruvate via D-alanine:quinone oxidoreductase (DadA)  
240 (Franklin & Venables, 1976). The absence of DadX activity likely reduces flux into an important alanine sink,

241 resulting in higher alanine availability which might be responsible for growth rescue in the mutants. To verify  
242 this hypothesis, we deleted *dadX* in the evolved strain, as well as in the parental glut-aux strain. Both strains  
243 (with overexpression of AlaA) immediately grew with alanine as amine donor (Fig. 6A, Supplementary Figure  
244 S3), verifying that reducing an important intracellular alanine sink allows the overexpressed transaminase to  
245 use alanine as an amine donor to effectively sustain growth. Noteworthy, a deletion of *DadA* in the glut-aux  
246 strain overexpressing AlaA did not restore growth with alanine as amine donor, indicating that the reversible  
247 conversion of L-alanine to D-alanine is already sufficient to reduce alanine availability below a critical level,  
248 where it cannot support enough flux via AlaA for cellular growth. Note that *dadX* is not essential, as *E. coli*  
249 possesses additional genes that are able to provide sufficient D-alanine for cell wall biosynthesis (Kang et al,  
250 2011; Wild et al, 1985).

251

### 252 **Engineering the utilization of $\beta$ -alanine as amine donor.**

253 The non-proteinogenic amino acid  $\beta$ -alanine is neither a suitable amine donor for the glut-aux strain nor an  
254 N-source for the wildtype (Fig. 2). In order to test if we could engineer the glut-aux strain to use  $\beta$ -alanine as  
255 an amine donor, we tested overexpression of two different  $\beta$ -alanine transaminases, the  $\beta$ -alanine-2-  
256 oxoglutarate aminotransferase from *Saccharomyces kluyveri* (BaOAT, Uniprot ID A5H0J5) and the  $\beta$ -alanine-  
257 pyruvate aminotransferase from *Pseudomonas aeruginosa* (BaPAT, Uniprot ID Q9I700). Overexpression of  
258 either BaPAT or BaOAT allowed the wildtype strain to grow using  $\beta$ -alanine as sole source of ammonia (Fig.  
259 6B). The enzymes transfer the amine group from  $\beta$ -alanine onto the ketoacids pyruvate and 2-oxoglutarate to  
260 generate alanine and glutamate, respectively. Both alanine and glutamate serve as N-sources for the wildtype  
261 (Fig. 2). The glut-aux strain however was only able to grow with  $\beta$ -alanine as an amine donor, when BaOAT,  
262 but not when BaPAT was overexpressed (Fig. 6B), which is in good agreement with our previous results that  
263 glutamate, but not alanine, can immediately serve as an amine donor in the glut-aux strain (Fig. 2). To further  
264 confirm that growth of the glut-aux + BaOAT strain was rescued by directly using  $\beta$ -alanine via the proposed  
265 transamination reaction catalyzed by BaOAT, we conducted a nitrogen-tracing experiment. The medium  
266 contained  $^{15}\text{N}$ -labeled ammonium together with 20 mM glycerol and 5 mM  $\beta$ -alanine. As expected, the majority  
267 of amino acids did not show any  $^{15}\text{N}$ -labeling (Supplementary Figure S4), confirming that their amino group  
268 originated from  $\beta$ -alanine, rather than from ammonium. The only exception were arginine and glutamine that  
269 were single-labeled, with the  $^{15}\text{N}$ -label originating from glutamine synthetase activity (see above).

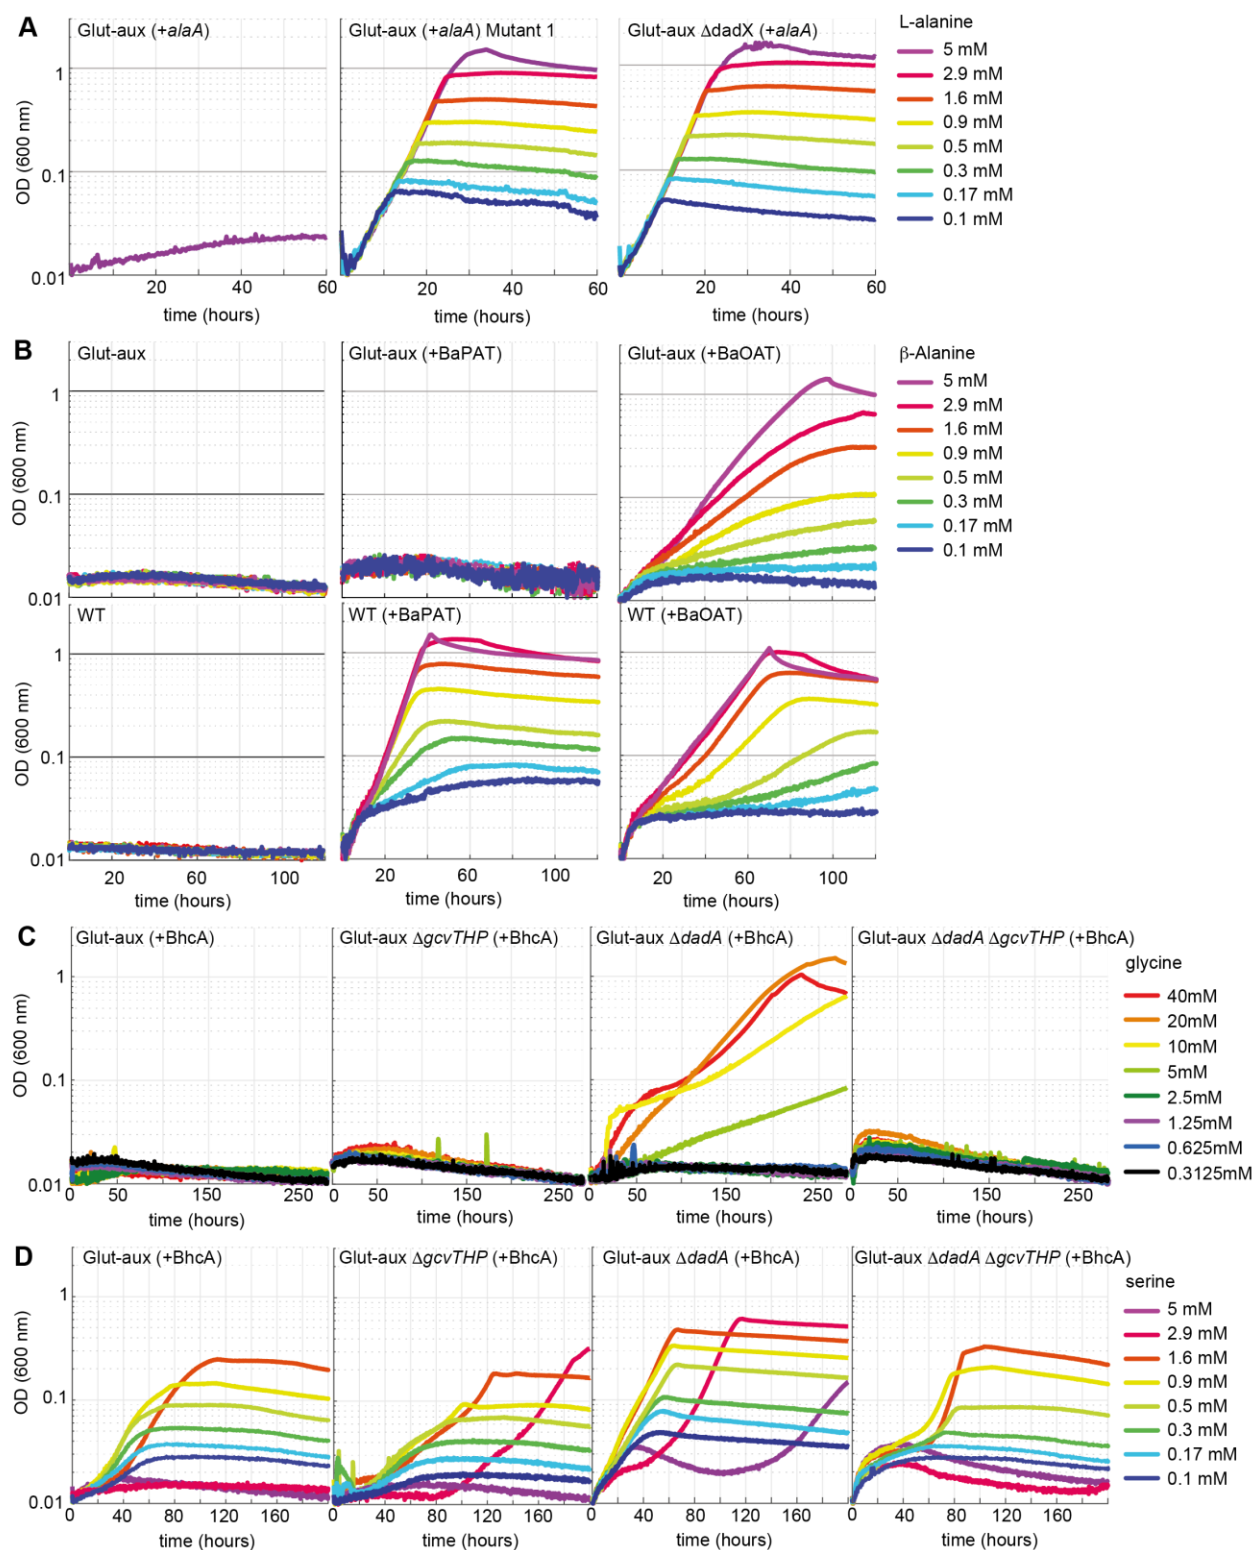

270

271 **Figure 6. Glut-aux strains engineered to use alanine,  $\beta$ -alanine, glycine and serine as amine source. A** DadX  
 272 mutation or deletion and alanine transaminase overexpression allows alanine utilization as amine source. Growth of the  
 273 glut-aux strains on 20 mM glycerol with 5 mM alanine as amine donor. **B** Overexpression of  $\beta$ -alanine-2-oxoglutarate  
 274 transaminase (BaOAT) enables amine donation from  $\beta$ -alanine in the glut-aux strain. Glut-aux strain and WT

275 overexpressing  $\beta$ -alanine-pyruvate aminotransferase (BaPAT) or  $\beta$ -alanine-2-oxoglutarate aminotransferase (BaOAT)  
276 where grown in media containing no N-source (WT) or ammonium-chloride (glut-aux), 20 mM glycerol and the indicated  
277  $\beta$ -alanine concentrations. **C** DadA deletion and BhcA overexpression allows glycine utilization as amine donor. Growth  
278 of the glut-aux strains +BhcA on 20 mM glycerol with indicated glycine concentrations. Data represents triplicate  
279 measurements with < 5 % variation. **D** BhcA overexpression allows use of serine as amine source, which is improved by  
280 additional deletion of *dadA*. Growth of the glut-aux strains +BhcA on 20 mM glycerol with indicated serine concentrations.  
281 All data represents triplicate measurements with < 5 % variation.

282

## 283 **Overexpression of a glycine-oxaloacetate transaminase allows growth of the glut-aux strain with** 284 **glycine after deletion of a glycine sink.**

285 Like alanine, glycine did not serve as amine source in the glut-aux strain (Fig. 2). As *E. coli* lacks a glycine  
286 transaminase, this amino acid cannot be directly generated by transamination of the respective ketoacid  
287 (glyoxylate). Instead, it is obtained from serine via the serine-hydroxymethyl-transferase reactions. To  
288 engineer the usage of glycine as amine donor, we overexpressed the glycine-oxaloacetate transaminase from  
289 *Paracoccus denitrificans* (BhcA, Uniprot ID A1B8Z3) in the glut-aux strain to form aspartate, which we have  
290 shown to support fast growth of the glut-aux strain (Fig. 2).

291 However, growth of the glut-aux strain overexpressing BhcA was not restored upon supplying the medium  
292 with glycine (Fig. 6 C, Supplementary Figure S5). We speculated that, similar to our results with alanine as  
293 amine donor described above, the provided glycine is further diverted into a sink. Hence we directed our  
294 efforts towards the glycine cleavage system and the potential promiscuous activity of the D-alanine:quinone  
295 oxidoreductase DadA with glycine. DadA has been reported to be active with a variety of D-amino acids (Wild  
296 & Klopotoski, 1981), and might potentially use glycine as a substrate as well. Indeed, the deletion of *dadA*  
297 allowed the strain to grow slowly with glycine as an amine donor (Fig. 6C), at first indicating glycine removal  
298 via promiscuous activity of DadA. However, *in vitro*, DadA showed only a very low specific activity with glycine  
299 (Supplementary Figure S6A) and an apparent  $K_M > 500$  mM for this amino acid (Supplementary Table S2),  
300 which strongly suggested that the catalytic efficiency ( $k_{cat}/K_M$  of  $0.275 \text{ M}^{-1} \text{ s}^{-1}$ ) of the enzyme (Supplementary  
301 Figure S6A, Supplementary Table S2) was insufficient to provide a strong glycine sink *in vivo*. Notably, DadA  
302 was previously reported to efficiently convert D-serine (Wild & Klopotoski, 1981), the product of alanine  
303 racemase Alr, which also acts on L-serine besides L-alanine (Ju et al, 2005). *In vitro* measurements of DadA  
304 confirmed a higher catalytic efficiency ( $k_{cat}/K_M$  of  $5.71 \text{ M}^{-1} \text{ s}^{-1}$ ) of DadA with with D-serine (Supplementary  
305 Figure S6A) than previously measured with glycine. BhcA exhibits much better kinetic properties with serine  
306 (tested with glyoxylate as the acceptor ( $K_M$  2.1 mM;  $k_{cat}$   $8.8 \text{ s}^{-1}$ )) than with glycine (Schada von Borzyskowski  
307 et al, 2019). We thus concluded that glycine needed to be converted to serine via combined activities of the  
308 glycine cleavage system (GCV), cleaving one glycine molecule to ammonium,  $\text{CO}_2$ , and 5,10-methylene-  
309 tetrahydrofolate, and serine-hydroxymethyl-transferase subsequently condensing the latter with a second  
310 glycine molecule to form serine. This pathway is used by *E. coli* when utilizing glycine as sole source of  
311 nitrogen (Newman et al, 1976). Supporting this hypothesis, the deletion of the GCV subunits *gcvTHP* in the

312 glut-aux strain overexpressing BhcA did not allow growth with glycine. Moreover, deletion of *gcvTHP* in the  
313 glut-aux  $\Delta dadA$  strain overexpressing BhcA abolished growth with glycine (Fig. 6C), providing strong evidence  
314 that glycine is converted to serine to utilize it as amine donor (Supplementary Figure S7). Moreover, compared  
315 to other amine donors tested the growth supported by glycine was very slow (stationary phase reached after  
316 200 h).

317 Next, we tested if serine (not an amine donor in the glut-aux strain (Fig 2)), served as amine donor for the  
318 glut-aux strain overexpressing BhcA. In good agreement with the conclusion of our glycine trials we found  
319 that growth of the glut-aux, glut-aux  $\Delta dadA$ , glut-aux  $\Delta gcvTHP$  and the glut-aux  $\Delta dadA \Delta gcvTHP$  strains (all  
320 overexpressing BhcA) was restored upon addition of low serine concentrations (Fig. 6D). In our growth  
321 experiments, serine concentrations above 1.7 mM seemed to be toxic to the strain, which can be explained  
322 by inhibition of isoleucine and aromatic amino acid biosynthesis by serine derived hydroxypyruvate (Hama et  
323 al, 1990). The glut-aux  $\Delta dadA$  reached the highest OD<sub>600</sub> on all tested serine concentrations, indicating that  
324 also here deletion of DadA is beneficial as it removes a sink for either glycine or serine directly (Fig. 6D). To  
325 further demonstrate serine transamination catalyzed by BhcA with oxaloacetate as amine acceptor, we  
326 conducted *in vitro* measurements with purified BhcA. The enzymatic coupling assay indeed confirmed amine  
327 transfer from serine to oxaloacetate (Supplementary Figure S6B, Supplementary Table S3). The resulting  $K_M$   
328 of 7 mM and a  $k_{cat}$  of 25.9 s<sup>-1</sup> (Supplementary Table S3) indicated a sufficient turnover of serine and  
329 oxaloacetate into aspartate and hydroxypyruvate. To further verify that the strain is indeed using the amine  
330 from glycine or serine, respectively, we conducted a labelling experiment growing the glut-aux  $\Delta dadA$   
331 overexpressing BhcA and a WT control on M9 with <sup>15</sup>NH<sub>4</sub> or M9 with <sup>14</sup>NH<sub>4</sub> supplemented with 20 mM glycerol  
332 and 20 mM glycine, or 1.7 mM serine. Aspartate, proline, serine, alanine and phenylalanine were unlabeled  
333 in the glut-aux  $\Delta dadA$  strain overexpressing BhcA, confirming that indeed all amines were derived only from  
334 the provided amino acid and not from free ammonium in the medium (Supplementary Figure S8).

335

### 336 **Exploring alternative routes of ammonium assimilation.**

337 After testing and engineering the glut-aux strain to use amino acids as amine group donors, we aimed to  
338 explore alternative ammonium assimilation pathways, thus a rewiring of canonical ammonium assimilation via  
339 glutamate. For this, we used the ammonium assimilation deficient glut-aux strain to test the enzymes aspartate  
340 ammonia-lyase and leucine dehydrogenase for their activity to supply all cellular amine for growth.

### 341 **Aspartate ammonia-lyase.**

342 Since aspartate served as an efficient amine donor (Fig. 2), we investigated whether it could also replace  
343 glutamate as the formation product of ammonium assimilation, catalyzed via reverse activity of aspartate  
344 ammonia-lyase (AspA; Uniprot ID P0AC38, fumarate + NH<sub>4</sub> = aspartate), an *E. coli* native reaction. This  
345 enzyme canonically operates as part of the aspartate utilization/degradation pathway releasing ammonia.  
346 However, the thermodynamics of this reaction reveal a full reversibility with a  $\Delta_rG^m$  of 4 [kJ/mol] (in the

347 aspartate forming direction at a concentration of 1 mM for all reactants; <http://equilibrator.weizmann.ac.il/>.  
 348 We hence overexpressed AspA in the glut-aux strain and analyzed its growth on a variety of carbon sources  
 349 (Fig. 7A). Here, growth of the strain is dependent on both the ammonium assimilation activity to form aspartate  
 350 and the subsequent aminotransferase activity to rescue the glut-aux. Growth of the glut-aux strain  
 351 overexpressing AspA (+AspA) was indeed observed on all tested carbon sources (Fig. 7A), suggesting that  
 352 aspartate and AspA can replace the canonical glutamate-based ammonium assimilation pathway. The glut-  
 353 aux +AspA strain grew fastest on carbon sources closest to fumarate, the substrate of AspA (2-oxoglutarate,  
 354 succinate, malate, fumarate). Other carbon sources (glucose, xylose, glycerol, acetate), which do not directly  
 355 generate fumarate, also supported growth, but with much higher doubling times. Assimilation of free  
 356 ammonium from the medium by the glut-aux +AspA strain was confirmed by a  $^{15}\text{N}$ -labelling experiment  
 357 comparing proteinogenic amino acid labeling of the glut-aux +AspA strain with the WT (serving as a positive  
 358 control) upon growth on 20 mM succinate with either  $^{15}\text{NH}_4$  or  $^{14}\text{NH}_4$ . Both strains, the WT and the glut-aux  
 359 +AspA strain, showed identical labeling (Fig. 7C).

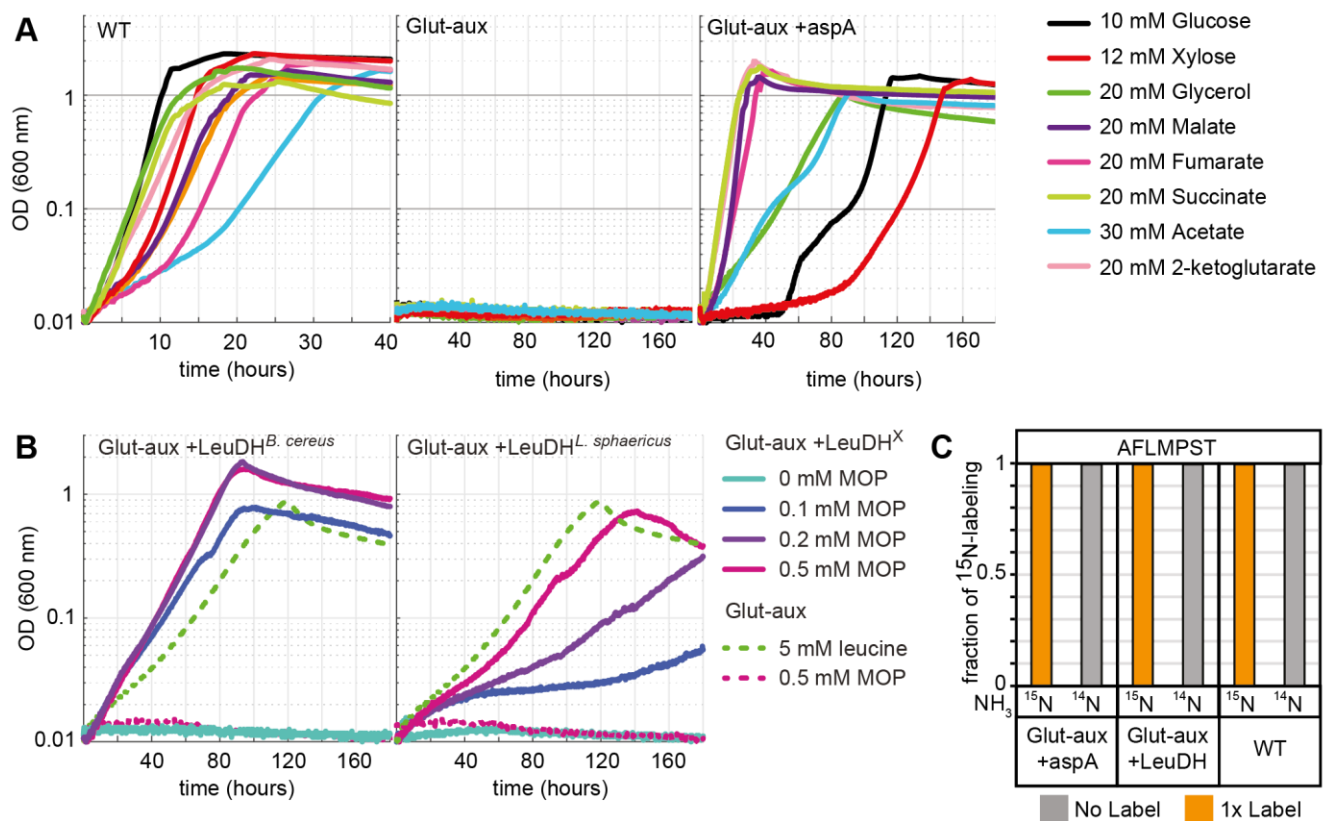

360

361 **Figure 7: Aspartate ammonia lyase or leucine dehydrogenase can replace glutamate-based ammonia assimilation**  
 362 **to fix all ammonium for cell growth. A** Growth of WT, glut-aux and glut-aux +aspA on M9 with indicated carbon sources.  
 363 Overexpression of aspartate ammonia lyase allows the glut-aux to assimilate free ammonium via fumarate amination.  
 364 **B** Growth of glut-aux and glut-aux +LeuDH from *Bacillus cereus* or *Lysinibacillus sphaericus* on M9 with 20 mM glycerol  
 365 as carbon source and the indicated additional substrates. Overexpression of LeuDH allows the glut-aux to assimilate  
 366 free ammonium from the medium in presence of MOP. **C** Schematic representation of nitrogen labelling results for glut-

367 aux +AspA, glut-aux +LeuDh and WT strains. Cells were grown either with  $^{15}\text{NH}_4$  or  $^{14}\text{NH}_4$  and 20mM succinate (glut-  
368 aux +AspA), 20 mM glycerol + 0.5 mM MOP (glutaux +LeuDh, from *B. cereus* or *L. sphaericus*) or 20 mM glycerol (WT).  
369 All strains were grown in M9 medium with ammonium. Data represents triplicate experiments with < 5 % variation.

370

### 371 **Leucine dehydrogenase.**

372 In our initial experiments, we showed that leucine can serve as amine group donor in the glut-aux strain  
373 (Fig. 2). To test if we can engineer the glut-aux strain to produce leucine for the concomitant transaminase  
374 reactions, we overexpressed leucine dehydrogenase, which catalyzes the reductive amination of 4-methyl-2-  
375 oxopentanoate (MOP) to leucine. Leucine dehydrogenase is absent in the repertoire of *E. coli*'s enzymes,  
376 hence we separately overexpressed two leucine dehydrogenase (LeuDh) genes, one from *Bacillus cereus*  
377 (Li et al, 2009) and the other from *Lysinibacillus sphaericus* (Lu et al, 2016). In initial experiments the glut-aux  
378 +LeuDh did not grow in minimal media with 20 mM glycerol. As MOP is not a central metabolite, its  
379 concentration might be limiting the activity of the enzyme. Consequently, we observed growth of the glut-aux  
380 strain only upon supplementation with catalytic amounts of MOP, which served as ammonium acceptor in the  
381 amination reaction catalyzed by leucine dehydrogenase (Fig 7B). We note that the MOP concentrations  
382 supplemented to the medium were at least 10-fold lower compared to the 5 mM leucine addition which served  
383 as a positive control in the experiments. The glut-aux strain overexpressing *Bacillus cereus* LeuDh growing  
384 on glycerol and 0.2- and 0.5-mM MOP reached twice the  $\text{OD}_{600}$  obtained for the glut-aux strain growing on  
385 glycerol and 5 mM leucine. This yield difference indicates a recycling of MOP through alternating activities of  
386 leucine dehydrogenase and transaminase, fixing ammonium and transferring amine groups to other  
387 ketoacids. Growth of the glut-aux strain overexpressing *L. sphaericus* LeuDh resulted in lower yields than  
388 achieved with *B. cereus* LeuDh overexpression, and also lower yields than seen for the glut-aux with 5 mM  
389 leucine, indicating lower enzyme efficiency under the tested conditions. To verify ammonium assimilation via  
390 leucine dehydrogenases the  $^{15}\text{N}$ -labeling in proteinogenic amino acids was analyzed after growing the glut-  
391 aux +LeuDh strains with 20 mM glycerol, 0.5 mM MOP, and either with  $^{15}\text{NH}_4$  or  $^{14}\text{NH}_4$  (Fig. 7C). The observed  
392 single label for the analyzed amino acids alanine, phenylalanine, methionine, proline, serine and threonine  
393 once again confirm operation of the leucine dehydrogenases ammonium entry point (Fig. 7C).

394

### 395 **Discussion**

396 Our study provides a broad investigation on amino acid and ammonium metabolism in *E. coli*. To examine  
397 which amino acids can be used as amine source to compensate for the absence of canonical glutamate  
398 production, we created a glut-aux strain and tested its ability to grow on different amino acids. Surprisingly,  
399 the glut-aux did not grow on all tested amino acids. Also, some of the canonical transamination products of  
400 glutamate did not rescue growth of the glut-aux strain via the reverse reaction (i.e. alanine). For this amino  
401 acid, we identified alanine degradation as the counteracting pathway. The glut-aux strain was capable of  
402 growth on most amino acids (proline, aspartate, asparagine, methionine, leucine, isoleucine, valine,



403 glutamate, glutamine, ornithine, tyrosine, phenylalanine, tryptophan and histidine). As absence of nitrogen  
404 from the medium only affected growth of the glut-aux on ornithine, we concluded that nitrogen response  
405 dependent regulation was of minor relevance for amino acid metabolism. We assumed that in order for the  
406 glut-aux strain to grow, these amino acids could either (i) fully replace glutamate as amine donor, (ii) could  
407 donate their amine directly to 2-ketoglutarate, (iii) were converted into an intermediate donating an amine to  
408 2-ketoglutarate to form glutamate or (iv) were direct glutamate precursors. To investigate which reaction  
409 produced glutamate, we deleted several genes responsible for the respective amino acid degradation  
410 pathway. While proline was directly converted to glutamate (iv), utilization of histidine, tyrosine, phenylalanine,  
411 tryptophan, methionine, isoleucine and leucine depended on transamination mediated by AspC, one of the  
412 three main transaminases in *E. coli* (Gelfand & Steinberg, 1977). Three aspects of this finding were surprising  
413 to us. First, deletion of AspC alone was sufficient to abolish growth of the glut-aux strain on tyrosine,  
414 phenylalanine, isoleucine and leucine. This was unexpected, since the other two main transaminases TyrB  
415 and IlvE share cross-reactivities with these amino acids, and indicates that despite of their cross-reactivity  
416 they cannot fully replace AspC *in vivo*. Residual tyrosine and phenylalanine aminotransferase activity in tyrB  
417 and ilvE knockout strains in previous works led to the hypothesis that AspC was mainly exhibiting these  
418 activities, which herewith is further supported (Gelfand & Steinberg, 1977). Second, deletion of AspC  
419 abolished growth on histidine, methionine, isoleucine and leucine for which only low or no specific activity of  
420 AspC was reported *in vitro* (Hayashi et al, 1993; Powell & Morrison, 1978). Under physiological conditions,  
421 the substrate range of AspC thus seems to be broader than previously anticipated. Third, the glut-aux  $\Delta$ aspC  
422 strain was unable to grow with tryptophan as amine source. Although activity of AspC with tryptophan was  
423 demonstrated *in vitro* (Hayashi et al, 1993; Powell & Morrison, 1978), transamination is not a known  
424 tryptophan degradation pathway in *E. coli* (Reitzer, 2014). We hence conclude that in the glut-aux strain,  
425 tryptophan is the direct substrate of AspC to form (indole-3-yl)-pyruvate and glutamate as in some bacteria  
426 (e.g. *Pseudomonas aeruginosa* (Bortolotti et al, 2016), *Clostridium sporogenes* (O'Neil & DeMoss, 1968)),  
427 protozoa (*Trichomonas vaginalis*, (Lowe & Rowe, 1985) or mammals (Shrawder & Martinez-Carrion, 1972).  
428 In summary, we expanded previous knowledge by several novel transamination routes in *E. coli*.

429

430 In addition to identifying natively present routes of amino acid metabolism, we demonstrated how amino acid  
431 metabolism can be rewired to allow utilization of new amine sources. Overexpression of alanine-2-  
432 oxoglutarate aminotransferase together with the removal of an alanine sink allowed usage of alanine as amine  
433 source. By overexpressing a transaminase transferring amines from  $\beta$ -alanine to 2-oxoglutarate we achieved  
434 usage of the non-proteinogenic amino acid  $\beta$ -alanine. Following the same logic, we deleted the D-amino acid  
435 dehydrogenase gene *dadA* as possible internal sink for glycine/serine and expressed an aspartate-glyoxylate  
436 aminotransferase to select for its reverse activity. The engineered strain was able to use the amine from  
437 glycine to support growth. Surprisingly, we discovered that the strain did not use glycine directly, but converted  
438 it to serine, which was yet another substrate of the transaminase, showing high activity for serine ( $k_{cat}$  of  
439  $25.87 \text{ s}^{-1}$ ) with oxaloacetate as amine acceptor. In principle, the newly discovered serine-oxaloacetate

440 transaminase activity can be coupled to formate assimilation via the reductive glycine pathway (Kim et al,  
441 2020), which fixes ammonium by reverse activity of the glycine cleavage system. This allows ammonium  
442 transfer to make aspartate and convert serine to hydroxypyruvate instead of pyruvate (generated via serine  
443 deaminase activity in the reductive glycine pathway), hence saving some ATP which is needed to convert  
444 pyruvate into PEP, essential for anaplerosis and gluconeogenesis. As shown by the aforementioned  
445 examples, the glut-aux strain is an excellent selection platform to screen for any reactions producing amino  
446 acids which can rescue growth and by that allow use of new amine sources.

447 The function of glutamate as universal amine transfer molecule originates in its role as canonical entry point  
448 of ammonium into metabolism (Kumada et al, 1993). We were interested in finding out whether the  
449 prominence of this ammonium assimilation mechanism can be explained by a significant advantage compared  
450 to other mechanisms of ammonium assimilation. To investigate this, we replaced canonical ammonium  
451 assimilation via glutamate biosynthesis with two alternative pathways. Both, fumarate amination to aspartate  
452 and 4-methyl-2-oxopentanoate amination to leucine, reconstituted the ability of the glut-aux strain to assimilate  
453 free ammonium. Growth dependent on ammonium assimilation via AspA was fastest when a carbon source  
454 metabolically close to fumarate was provided. We note that assimilation of ammonium via aspartate ammonia-  
455 lyase is energetically different from ammonium assimilation via glutamate. While a glutamate dependent  
456 amination network requires NADPH consumption by glutamate dehydrogenase, an aspartate ammonia-lyase  
457 dependent network requires NADH for the reduction of oxaloacetate back to fumarate; oxaloacetate being the  
458 transamination product of aspC. NADH is energetically cheaper compared to NADPH, as the recovery of the  
459 latter from NADH wastes some proton motive force through the membrane bound transhydrogenase, and  
460 hence comes with the indirect cost of ATP synthesis (Spaans et al, 2015). Although ammonium assimilation  
461 via aspartate or leucine biosynthesis led to immediate growth of the glut-aux strain in growth-optimized  
462 laboratory conditions, these do not reflect natural conditions under which glutamate-based ammonium  
463 assimilation might have evolved and become prominent. Under ammonium limiting conditions, GDH and GS  
464 are kinetically superior with a  $K_M$  of 2 mM and 0.1 mM for ammonia, respectively (Reitzer, 2014) when  
465 compared to AspA or LeuDh from *Bacillus cereus* with  $K_M$  values of 20 mM and 13 mM for ammonia,  
466 respectively (Suzuki et al, 1973) (Sanwal & Zink, 1961). Additionally, the availability of two different systems  
467 (GDH and GS/GOGAT) which are each optimal for different growth conditions but generate the same molecule  
468 is unique about glutamate-based ammonium assimilation. The interplay of these systems allows a more  
469 flexible metabolic response to varying nitrogen and energy availability than leucine dehydrogenase or  
470 aspartate ammonia lyase and might thus explain the conservation of glutamate coupled ammonium  
471 assimilation, which is mirrored by presence of GS in all extant organisms (Kumada et al, 1993).

472 The possibility to modify ammonium metabolism by metabolic engineering indicates that the underlying  
473 metabolic network is highly flexible. Additionally, these findings might have relevance for the metabolic  
474 engineering of synthetic pathways, e.g. for growth coupled selection (Orsi et al, 2021) or the production of  
475 certain amino acids or their derivatives. By engineering ammonium assimilation via non-glutamate producing

476 reactions, the cell's need for ammonium assimilation can be decoupled from glutamate biosynthesis for the  
477 production of nitrogenous compounds. This view is in agreement with the paradigm of modular design for  
478 bioengineering, which can support new endeavors for strain design for biotechnological production processes.  
479 Here, the most obvious impact could be made on the million-ton scale industrial amino acid production  
480 (Wendisch, 2020). Therefore, engineering new ammonium entry points as well as extending the amination  
481 network could positively affect these processes.

482 Altogether, our research addressed three distinct and complementary aspects regarding amino acid and  
483 ammonium metabolism. We provided a comprehensive overview on the options and limitations of the cell's  
484 amination network. Then, we showed its flexibility when engineering the network for new amine sources.  
485 Finally, by engineering new ammonium entry-points, we increased the potential design space for engineering  
486 ammonium assimilation and dissimilation.

487

488

## 489 Methods

490 **Strains.** All *E. coli* strains used in this study are listed in Table 1. Strain SIJ488, which carries inducible  
 491 recombinase and flippase genes (Jensen et al, 2015), was used as wildtype for generation of deletions. Gene  
 492 deletions were performed by  $\lambda$ -Red recombineering or P1-transduction as described below.

493 **Table 1. Strains and plasmids used in this study**

| name                                              | Description / deletions                                                                                                | References           |
|---------------------------------------------------|------------------------------------------------------------------------------------------------------------------------|----------------------|
| <b><i>E. coli</i> strains</b>                     |                                                                                                                        |                      |
| DH5 $\alpha$                                      | Cloning of overexpression constructs                                                                                   |                      |
| SIJ488                                            | WT, integrated $\lambda$ -red recombinase and flippase                                                                 | (Jensen et al, 2015) |
| glut-aux                                          | $\Delta$ <i>gdhA</i> $\Delta$ <i>gltBD</i>                                                                             | This study           |
| glut-aux $\Delta$ <i>ybdL</i>                     | $\Delta$ <i>gdhA</i> $\Delta$ <i>gltBD</i> $\Delta$ <i>ybdL</i>                                                        | This study           |
| glut-aux $\Delta$ <i>putA</i>                     | $\Delta$ <i>gdhA</i> $\Delta$ <i>gltBD</i> $\Delta$ <i>putA</i>                                                        | This study           |
| $\Delta$ <i>putA</i>                              | $\Delta$ <i>putA</i>                                                                                                   | This study           |
| glut-aux $\Delta$ <i>aspC</i>                     | $\Delta$ <i>gdhA</i> $\Delta$ <i>gltBD</i> $\Delta$ <i>aspC</i>                                                        | This study           |
| glut-aux $\Delta$ <i>dadX</i>                     | $\Delta$ <i>gdhA</i> $\Delta$ <i>gltBD</i> $\Delta$ <i>dadX</i>                                                        | This study           |
| glut-aux $\Delta$ <i>dadA</i>                     | $\Delta$ <i>gdhA</i> $\Delta$ <i>gltBD</i> $\Delta$ <i>dadA</i>                                                        | This study           |
| glut-aux $\Delta$ <i>gcv</i>                      | $\Delta$ <i>gdhA</i> $\Delta$ <i>gltBD</i> $\Delta$ <i>gcvTHP</i>                                                      | This study           |
| glut-aux $\Delta$ <i>gcv</i> $\Delta$ <i>dadA</i> | $\Delta$ <i>gdhA</i> $\Delta$ <i>gltBD</i> $\Delta$ <i>gcvTHP</i> $\Delta$ <i>dadA</i>                                 | This study           |
| JW0999                                            | KEIO $\Delta$ <i>putA</i>                                                                                              | (Baba et al, 2006)   |
| <b>Plasmids</b>                                   |                                                                                                                        |                      |
| ASS                                               | Over-expression plasmid with p15A origin, Streptomycin resistance, constitutive strong promoter                        | (Wenk et al, 2018)   |
| ASS-aspA                                          | ASS backbone for overexpression of <i>aspA</i> from <i>E. coli</i>                                                     | This study           |
| ASS-alaA                                          | ASS backbone for overexpression of <i>alaA</i> from <i>E. coli</i>                                                     | This study           |
| ASS-alaC                                          | ASS backbone for overexpression of <i>alaC</i> from <i>E. coli</i>                                                     | This study           |
| ASS-leuDH <sup>B. cereus</sup>                    | ASS backbone for overexpression of leucine dehydrogenase from <i>Bacillus cereus</i>                                   | This study           |
| ASS-leuDH <sup>L. sphaericus</sup>                | ASS backbone for overexpression of leucine dehydrogenase from <i>Lysinibacillus sphaericus</i>                         | This study           |
| ASS-BAPAT                                         | ASS backbone for overexpression of $\beta$ -alanine-pyruvate-aminotransferase from <i>Pseudomonas aeruginosa</i>       | This study           |
| ASS-BAOAT                                         | ASS backbone for overexpression of $\beta$ -alanine-2-oxoglutarate-aminotransferase from <i>Saccharomyces kluyveri</i> | This study           |
| ASS-BhcA                                          | ASS backbone for overexpression of glycine-oxaloacetate aminotransferase from <i>Paracoccus denitrificans</i>          | This study           |

494

495 **Gene deletion via P1 transduction.** Deletions of *putA* and *dadX* were generated by P1 phage transduction  
 496 (Thomason et al, 2007). Strains from the Keio collection carrying single gene deletions with a kanamycin-  
 497 resistance gene (KmR) as selective marker were used as donor strains (Baba et al, 2006). Selection for strains  
 498 that had acquired the desired deletion was performed by plating on appropriate antibiotics (Kanamycin, Km)  
 499 and confirmed by determining the size of the respective genomic locus *via* PCR using DreamTaq polymerase  
 500 (Thermo Scientific, Dreieich, Germany) and the respective KO-Ver primers (Supplementary Table S4).  
 501 Additionally, it was confirmed that no copy of the gene to be deleted was present anywhere in the genome by  
 502 PCR using DreamTaq polymerase (Thermo Scientific, Dreieich, Germany) and internal primers binding inside  
 503 of the coding sequence of the gene. To remove the selective marker, a fresh culture was grown to OD<sub>600</sub> ~  
 504 0.2, followed by inducing flippase expression by adding 50mM L-rhamnose and cultivating for ~4h at 30°C.

505 Loss of the antibiotic resistance was confirmed by identifying individual colonies that only grew on LB in  
506 absence of the respective antibiotic and by PCR of the genomic locus using the locus specific KO-Ver primers.

507 **Gene deletion by recombineering.** For gene deletion by recombineering, kanamycin resistance cassettes  
508 were generated via PCR – ‘KO’ primers with 50 bp homologous arms are listed in Supplementary Table S4 –  
509 using the kanamycin (Km) cassette from pKD4 (pKD4 was a gift from Barry L. Wanner (Addgene plasmid #  
510 45605; <http://n2t.net/addgene:45605>; RRID:Addgene\_45605), (Datsenko & Wanner, 2000)) ((Baba et al,  
511 2006)), or in case of the *aspC* deletion the chloramphenicol (Cap) cassette from pKD3 (pKD3 was a gift from  
512 Barry L. Wanner (Addgene plasmid # 45604; <http://n2t.net/addgene:45604> ; RRID:Addgene\_45604)). To  
513 prepare cells for gene deletion, fresh cultures were inoculated in LB and the recombinase genes were induced  
514 by addition of 15 mM L-arabinose at OD ~0.4-0.5. After incubation for 45 min at 37°C cells were harvested  
515 and washed three times with ice cold 10 % glycerol (11,000 rpm, 30 sec, 2°C). ~300 ng of Km cassette PCR-  
516 product was transformed via electroporation (1 mm cuvette, 1.8 kV, 25 µF, 200 Ω). After selection on  
517 kanamycin, gene deletions were confirmed via PCR using ‘KO-Ver’ primers (Supplementary Table S4). To  
518 remove the Km cassette, 50 mM L-rhamnose, which induces flippase gene expression, was added to an  
519 exponentially growing 2 ml LB culture at OD 0.5; induction time was ≥ 3 h at 30°C. Colonies were screened  
520 for kanamycin sensitivity and removal of antibiotic resistance cassette was confirmed by PCR (using ‘KO-Ver’  
521 primers).

522 **Plasmid construction.** For overexpression, genes encoding for leucine dehydrogenases from *Bacillus*  
523 *cereus* (LeuDH<sup>B. cereus</sup>, P0A392) and *Lysinibacillus sphaericus* (LeuDH<sup>L. sphaericus</sup>, B1HRW1), aspartate  
524 ammonia-lyase from *E. coli* (AspA, P0AC38), β-alanine oxoglutarate transaminase from *Saccharomyces*  
525 *kluuyveri* (BAOAT, A5H0J5), β-alanine pyruvate transaminase from *Pseudomonas aeruginosa* (BAPAT,  
526 Q9I700), and Glycine-oxaloacetate-aminotransferase from *Paracoccus denitrificans* (BhcA, A1B8Z3) were  
527 synthesized after removal of restriction sites relevant for cloning (Zelcbuch et al, 2013) and codon adaptation  
528 to *E. coli*'s codon usage (Grote et al, 2005). Genes were synthesized by Twist Bioscience (San Francisco,  
529 CA, USA). Alanine transaminase genes *alaA* and *alaC* were amplified from *E. coli*'s genome with high-fidelity  
530 Phusion Polymerase (Thermo Scientific, Dreieich, Germany) using primer pairs *alaA*-amp\_fwd, *alaA*-amp\_rvs  
531 and *alaC*-amp\_fwd, *alaC*-amp\_rvs, respectively (Supplementary Table S4).

532 Cloning was carried out in *E. coli* DH5α. All genes were cloned via *Mph1103I* and *XhoI* into pNivC vector  
533 downstream of ribosome binding site “C” (AAGTTAAGAGGCAAGA) (Zelcbuch et al, 2013). Restriction  
534 enzymes *EcoRI* and *PstI* (FastDigest, Thermo Scientific) were used to transfer the genes into the expression  
535 vector pZ-ASS (p15A origin, Streptomycin resistance, strong promoter) (Braatsch et al, 2008). Constructed  
536 vectors were confirmed by Sanger sequencing (LGC Genomics, Berlin, DE). The software Geneious 8  
537 (Biomatters, New Zealand) was used for *in silico* cloning and sequence analysis.

538 The plasmid for the expression of the *dadA* gene was retrieved from the ASKA collection (Kitagawa et al,  
539 2005). The plasmids for the expression of the *bhcA* and *ghrA* genes were described in previous publications  
540 (Miller et al, 2020; Schada von Borzyskowski et al, 2019).

541 **Media and growth experiments.** LB medium (1% NaCl, 0.5% yeast extract, 1% tryptone) was used for  
542 cloning, generation of deletion strains, and strain maintenance. When appropriate, kanamycin (25 µg/mL),  
543 ampicillin (100 µg/mL), streptomycin, (100 µg/mL), or chloramphenicol (30 µg/mL) were used but omitted for  
544 growth experiments. Growth experiments were carried out in standard M9 minimal media (50 mM Na<sub>2</sub>HPO<sub>4</sub>,  
545 20 mM KH<sub>2</sub>PO<sub>4</sub>, 1 mM NaCl, 20 mM NH<sub>4</sub>Cl, 2 mM MgSO<sub>4</sub> and 100 µM CaCl<sub>2</sub>, 134 µM EDTA, 13 µM  
546 FeCl<sub>3</sub>·6H<sub>2</sub>O, 6.2 µM ZnCl<sub>2</sub>, 0.76 µM CuCl<sub>2</sub>·2H<sub>2</sub>O, 0.42 µM CoCl<sub>2</sub>·2H<sub>2</sub>O, 1.62 µM H<sub>3</sub>BO<sub>3</sub>, 0.081 µM  
547 MnCl<sub>2</sub>·4H<sub>2</sub>O) or in M9 media lacking NH<sub>4</sub>Cl. Carbon sources were used as indicated in the text. Unless  
548 otherwise specified, L-isomers of amino acids were used if extant. For growth experiments overnight cultures  
549 were incubated in 4 mL M9 medium containing 20 mM glycerol supplemented with 5 mM aspartate. Cultures  
550 were harvested (6,000\*g, 3 min) and washed three times in M9 medium (w/ or w/o NH<sub>4</sub>Cl) to remove residual  
551 carbon and NH<sub>4</sub>Cl sources. Washed cells were used to inoculate growth experiments to an optical density  
552 (OD<sub>600</sub>) of 0.01 in 96-well microtiter plates (Nunclon Delta Surface, Thermo Scientific) at 37°C. Each well  
553 contained 150 µL of culture and 50 µL mineral oil (Sigma-Aldrich) to avoid evaporation while allowing gas  
554 exchange. Growth was monitored in technical triplicates at 37°C in BioTek Epoch 2 Microtiterplate reader  
555 (BioTek, Bad Friedrichshall, Germany) by absorbance measurements (OD<sub>600</sub>) of each well every ~10 minutes  
556 with intermittent orbital and linear shaking. Blank measurements were subtracted and OD<sub>600</sub> measurements  
557 were converted to cuvette OD<sub>600</sub> values by multiplying with a factor of 4.35, as previously established  
558 empirically for the instruments. Growth curves were plotted in MATLAB and represent averages of  
559 measurements of technical replicates.

560 **Isolation and sequence analysis of glut-aux ASS-*alaA* mutants.** The glut-aux strain +*alaA* was inoculated  
561 to OD<sub>600</sub> of 0.02 in tube cultures of 4 mL M9 + 20mM glycerol + 5mM alanine. Cell growth was monitored  
562 during prolonged incubation at 37°C for 7-14 days. Within that time several cultures started to grow and  
563 reached an OD above 1.0. Cells were streaked out on LB plates with streptomycin (to maintain the pZ-ASS-  
564 *alaA* plasmid) by dilution streak to generate single colonies. Isolates were inoculated into tube cultures of 4  
565 mL M9 + 20mM glycerol + 5mM alanine, and the ones which immediately grew were used in genome  
566 sequence analysis. Genomic DNA was extracted using the Macherey-Nagel NucleoSpin Microbial DNA  
567 purification Kit (Macherey-Nagel, Düren, Germany) from 2x10<sup>9</sup> cells of an overnight culture in LB medium  
568 supplied with streptomycin and chloramphenicol (to maintain pZ-ASS-*alaA* plasmid). Construction of  
569 (microbial short insert libraries) PCR-free libraries for single-nucleotide variant detection and generation of  
570 150 bp paired-end reads on an Illumina HiSeq 3000 platform were performed by Novogene (Cambridge, UK).  
571 Reads were mapped to the reference genome of *E.coli* MG1655 (GenBank accession no. U00096.3) using  
572 the software Breseq (Barrick Lab, Texas) (Deatherage & Barrick, 2014). Using algorithms supplied by the  
573 software package, we identified single-nucleotide variants (with >50% prevalence in all mapped reads) and

574 searched for regions with coverage deviating more than 2 standard deviations from the global median  
575 coverage.

576 **<sup>15</sup>N isotopic labelling of proteinogenic amino acids.** To elucidate the origin of the nitrogen in amino acids  
577 we used <sup>15</sup>N isotope tracing experiments. Proteinogenic amino acids were analyzed after cell growth in M9  
578 containing <sup>15</sup>NH<sub>4</sub>Cl (Sigma-Aldrich, Germany). Cells (1 mL of OD<sub>600</sub> 1) were harvested by centrifugation  
579 (6,000\*g) after reaching stationary phase and washed in H<sub>2</sub>O. Proteins were hydrolyzed in 6 N HCl, at 95°C  
580 for 24 h (You et al, 2012). HCl was removed by evaporation under an air stream at 95°C. Samples were then  
581 resuspended in 1 ml H<sub>2</sub>O, insoluble compounds were removed by centrifugation (10 min, 16,000\*g), and  
582 supernatants were used for analysis. Amino acid masses were analyzed by UPLC-ESI-MS as described  
583 previously (Giavalisco et al, 2011) with a Waters Acquity UPLC system (Waters) using a HSS T3 C18 reversed  
584 phase column (100 mm × 2.1 mm, 1.8 μm; Waters). The mobile phases were 0.1 % formic acid in H<sub>2</sub>O (A)  
585 and 0.1% formic acid in acetonitrile (B). The flow rate was 0.4 mL/min with a gradient of 0 to 1 min – 99% A;  
586 1 to 5 min – linear gradient from 99% A to 82%; 5 to 6 min – linear gradient from 82% A to 1% A; 6 to 8 min  
587 – kept at 1% A; 8-8.5 min – linear gradient to 99% A; 8.5-11 min – re-equilibrate. Mass spectra were acquired  
588 using an Exactive mass spectrometer (Thermo Scientific) in positive ionization mode, with a scan range of  
589 50.0 to 300.0 m/z. The spectra were recorded during the first 5 min of the LC gradients. Data analysis was  
590 performed using Xcalibur (Thermo Scientific). Amino acid standards (Sigma-Aldrich, Germany) were analyzed  
591 for determination of the retention times under the same conditions.

592 **Protein purification.** To produce DadA and GhrA proteins for *in vitro* characterization, *E. coli* BL21 cells were  
593 transformed with the plasmid containing the respective gene. The cells were then grown on LB agar plates  
594 containing 50 μg/mL kanamycin or 100 μg/mL ampicillin at 37 °C overnight. Grown cells were used to inoculate  
595 a liter of selective terrific broth (TB). The expression cultures were grown overnight at 25 °C in a shaking  
596 incubator. Their biomass was collected by centrifugation at 6,000 g for 15 min at room temperature. The cells  
597 were resuspended in twice their volume of buffer A (50 mM HEPES/KOH pH 7.8, 500 mM NaCl). The cells  
598 were lysed with a Microfluidizer (LM-10 H10Z, Microfluidics, Westwood, US) at 16.000 PSI for three passes  
599 on ice and the lysate was cleared by ultracentrifugation at 100,000xg for 45 min at 4 °C and subsequently  
600 filtered through a 0.45 μm PTFE filter. The filtered lysate was loaded onto a 1 ml HisTrap FF (GE Healthcare,  
601 Freiburg, Germany) and unbound protein was removed with 20 column volumes of 15% buffer B (50 mM  
602 HEPES/KOH pH 7.8, 500 mM NaCl, 500 mM Imidazole) in buffer A. The protein was then eluted in 100%  
603 buffer B. The protein was desalted with a HiTrap 5 ml Desalting column (GE Healthcare, Freiburg, Germany)  
604 and a desalting buffer (50 mM HEPES/KOH, 50 mM NaCl, 20% (v/v) Glycerol). Protein concentrations were  
605 determined by the protein's theoretical extinction coefficient and their absorbance at 280 nm. BhcA was  
606 expressed and purified as described previously (Schada von Borzyskowski et al, 2019).

607 **Measurement of enzyme activity.** The activities of all tested enzymes were measured with a Cary 60 UV-  
608 Vis spectrophotometer (Agilent Technologies GmbH, Waldbronn, Germany) at 37°C. To test the transaminase  
609 activity of BhcA with serine, the absorbance at 365 nm of the reaction mix (50 mM HEPES/KOH pH 7.5, 0.7

610 mM NADPH, 7 mM OAA, 30  $\mu$ g GhrA, and 2.5  $\mu$ g BhcA; modified based on Schada von Borzyskowski et al.,  
611 2019) was tracked over time. The reaction was started by adding varying concentrations of serine to the  
612 mixture and the resulting slope in absorbance decrease was measured.  
613 To test the activity of BhcA for oxaloacetate, another reaction mix (50 mM HEPES/KOH pH 7.5, 0.7 mM  
614 NADPH, 100 mM serine, 30  $\mu$ g GhrA, and 2.5  $\mu$ g BhcA) was prepared. This time the reaction was started by  
615 adding oxaloacetate in varying concentrations to the mix. Activities of DadA were measured via following the  
616 absorbance of Dichlorophenolindophenole (DCPIP) at 600 nm. To measure activity with D-alanine the  
617 reaction mix (200 mM HEPES/KOH pH 7.5, 0.1mM DCPIP, 1.5 mM PES, 10 mM KCN, 60  $\mu$ g DadA) was  
618 started with varying concentrations of D-alanine. To measure the same reaction for glycine, the amount of  
619 DadA was increased to 280  $\mu$ g, and the reaction was started with glycine.

620



621

## 622 **Acknowledgements**

623 This work was funded by the Max Planck Society. S.N.L. acknowledges support from the BMBF grant  
624 ForceYield (031B0825B). T.J.E. acknowledges additional support from the German Research Foundation  
625 (SFB987 'Microbial diversity in environmental signal response').

626

## 627 **Author contributions**

628 S.N.L. and A.B.-E. conceived and supervised the study. S.N.L., A.B.-E. and S.A. designed the experiments.  
629 H.S.M., A.M. and T.W. constructed plasmids and strains and performed growth experiments. H.S.M. analyzed  
630 the genome sequencing data. H.S.M. performed and analyzed <sup>15</sup>N-labeling experiments, P.P. and L.S.v.B.  
631 purified enzymes and analyzed enzyme activities. S.N.L., H.S.M, and T.J.E. analyzed the results and wrote  
632 the manuscript with contributions from all authors.

633

## 634 **Conflict of interest**

635 The authors declare that they have no conflict of interest.

636

637

638 **Supplementary material**

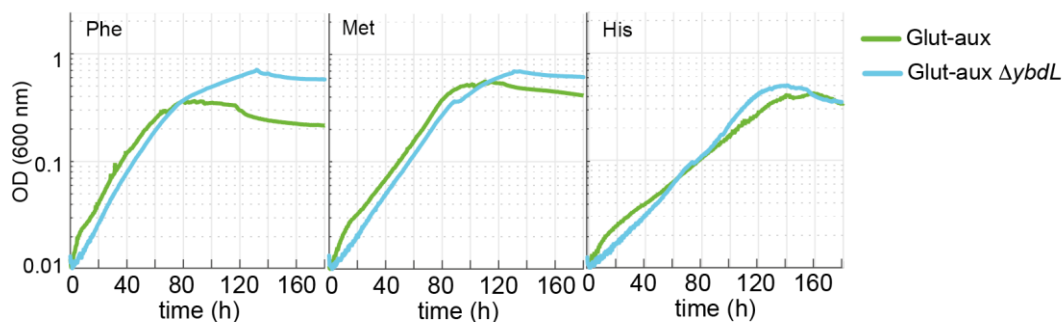

639

640 **Figure S1: Deletion of *ybdL* does not alter growth of the glut-aux strain with phenylalanine, methionine and**  
 641 **histidine as amine sources.** Experiments were carried out in M9 w/ ammonium containing 20 mM glycerol and 5 mM  
 642 of the indicated amine-sources. Data represents means of triplicates with < 5 % variation.

643

644

645

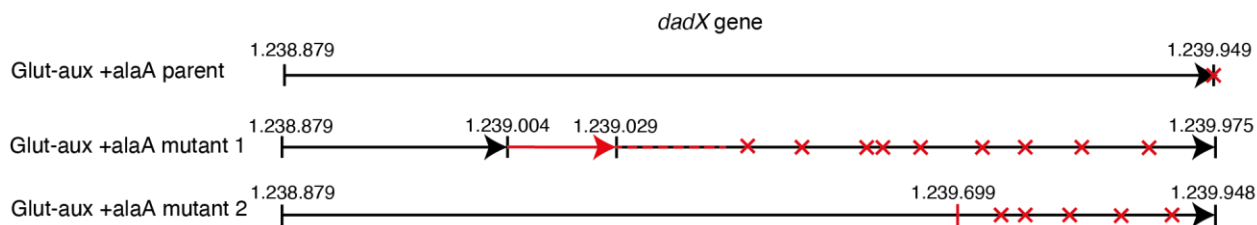

646

647 **Figure S2: Schematic presentation of 26 bp duplication (red) found in the *dadX* gene of the glut-aux +alaA mutant 1 and**  
 648 **1 bp deletion in the *dadX* gene glut-aux +AlaA mutants 2 and 3 in comparison to the glut-aux +alaA parent. Both mutations**  
 649 **cause stop codons (red crosses) within the *dadX* gene reading frame.**

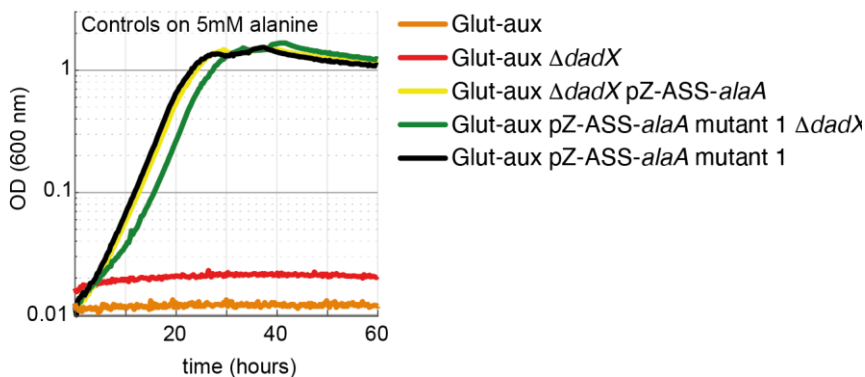

650

651 **Figure S3: DadX mutation or deletion and alanine transaminase overexpression allows alanine utilization as**  
652 **amine source.** Growth of the glut-aux strains on M9 w/ammonium and 20 mM glycerol with 5 mM alanine as amine  
653 donor. Strains not overexpressing alanine transaminase cannot utilize alanine as amine source. All data represents  
654 triplicate measurements with < 5 % variation.

655

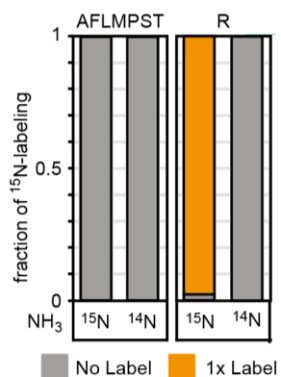

656

657 **Figure S4: <sup>15</sup>N-labelling experiments confirm incorporation of the amino group of β-alanine into proteinogenic**  
658 **amino acids (single letter code).** The glut-aux +BaOAT strain was grown in medium containing 20 mM glycerol with 5  
659 mM β-alanine and either <sup>14</sup>NH<sub>4</sub> or <sup>15</sup>NH<sub>4</sub>. Data represents means of three independent experiments.

660

661

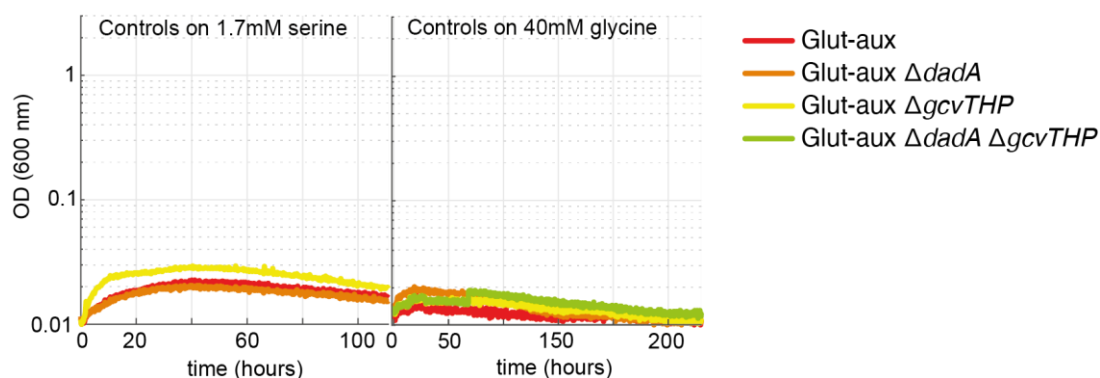

662

663 **Figure S5: Transaminase overexpression is essential for use of serine or glycine as amine donor in the glut-aux**  
664 **strain.** Glut-aux strains not overexpressing BhcA were incubated in M9 w/ ammonium and 20 mM glycerol and 1.7 mM  
665 serine or 40 mM glycine as amine donor. No growth was obtained, indicating the need for BhcA overexpression for  
666 utilization of glycine or serine as amine sources. All data represents triplicate measurements with < 5 % variation.

667

668

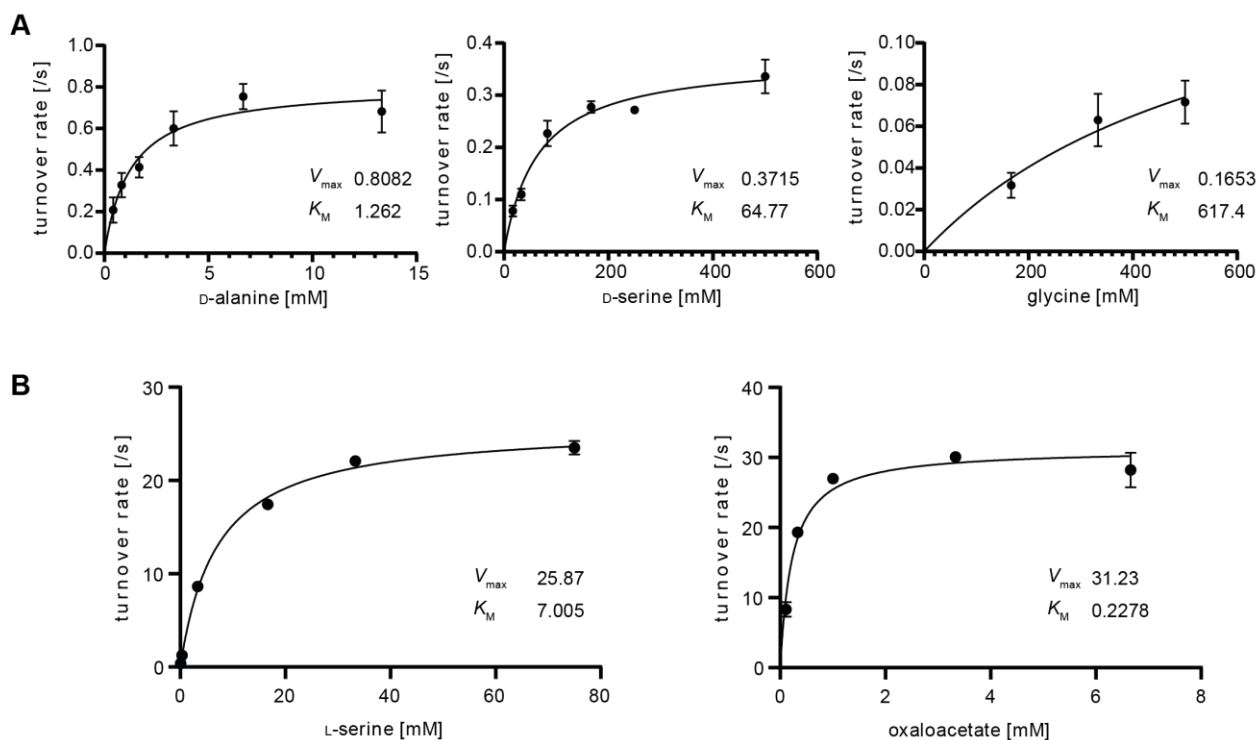

669

670 **Figure S6:** Michaelis-Menten kinetics of DadA and BhcA for selected substrates. **A** DadA turnover rate with D-alanine  
 671 (left), D-serine (middle) and glycine (right) measured in a DCPIP-coupled assay. **B** BhcA turnover rate with serine (left)  
 672 and oxaloacetate (right). To saturating concentrations of oxaloacetate (left) or serine (right), different concentrations of  
 673 the respective other substrate were added in an assay coupling BhcA mediated hydroxypyruvate formation to NADPH  
 674 dependent hydroxypyruvate reduction catalyzed by GhrA. Data are shown from  $n = 3$  independent experiments at  
 675 different substrate concentrations. Kinetic parameters are listed in Supplementary Table 2 (DadA) and Supplementary  
 676 Table 3 (BhcA).

677

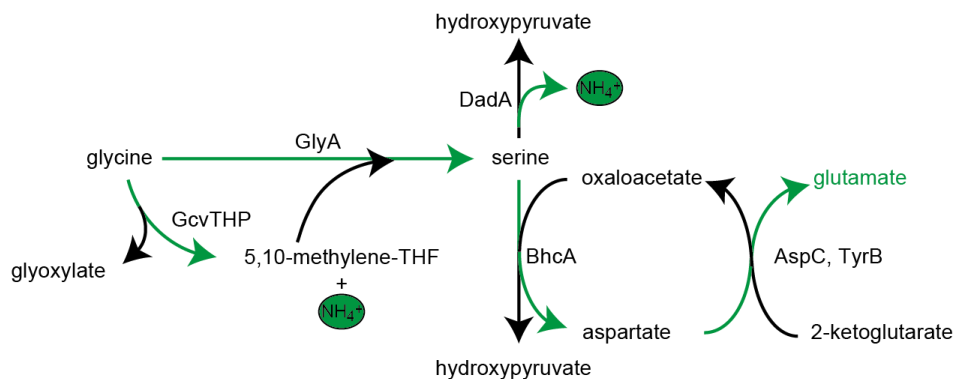

678

679 **Figure S7: Schematic presentation of glycine and serine utilization by the glut-aux strain  $\Delta dadA$  expressing**  
 680 **BhcA.** Glycine is converted to serine by combined activity of GlyA and GcvTHP, which is then substrate for BhcA in a  
 681 transamination reaction with oxaloacetate. The formed aspartate allows glutamate formation via native transaminases.

682 DadA promiscuously deaminating serine to form hydroxypyruvate might be an intracellular serine sink and needed to be  
 683 deleted for optimal growth of the glutaux +BhcA with glycine or serine as amine source. Notably, the BhcA substrate L-  
 684 serine would first need to be converted to D-serine, for example by promiscuously acting alanine racemase Alr, to be  
 685 substrate for DadA. Green arrows indicate the transfer of ammonium.

686

687

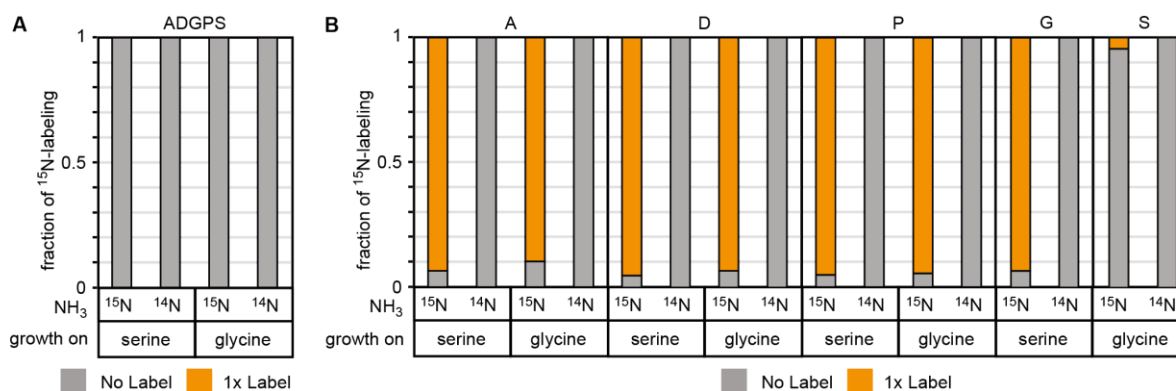

688

689 **Figure S8: <sup>15</sup>N-labeling confirms amine donation from serine or glycine in glut-aux  $\Delta$ dadA +BhcA.** **A** Glut-aux  
 690  $\Delta$ dadA +BhcA grown on <sup>15</sup>N-NH<sub>3</sub>Cl M9 medium or <sup>14</sup>N-NH<sub>3</sub>Cl M9 medium with 20 mM glycerol as carbon source. **B** WT  
 691 grown on <sup>15</sup>N-NH<sub>3</sub>Cl M9 medium or <sup>14</sup>N-NH<sub>3</sub>Cl M9 medium with 20 mM glycerol as carbon source. For both strains, <sup>15</sup>N  
 692 labeling in amino acids (single letter code) was analyzed upon feeding with 1.7 mM of unlabeled serine or 20 mM of  
 693 unlabeled glycine. Data represents means of triplicate measurements with errors < 5 %.

694

695 **Table S1. Mutations found in Glutaux +alaA mutants 1 and 2.** After sequencing the genomes of two independently  
 696 isolated glutaux +alaA mutants and the glutaux +alaA parent, the results were mapped against the *E. coli* MG1655  
 697 reference genome (GenBank accession no. U00096.3) using breseq. Mutations occurring in the mutants and not the  
 698 parent are listed.

| Strain                 | position  | mutation                                    | annotation           | gene          | description        |
|------------------------|-----------|---------------------------------------------|----------------------|---------------|--------------------|
| Glutaux +alaA mutant 1 | 1,238,253 | (TATTGAGCGTATCTGGAGCGCGATCG) <sub>1→2</sub> | coding (151/1071 nt) | <i>dadX</i> → | alanine racemase 2 |
| Glutaux +alaA mutant 2 | 1,238,923 | Δ1 bp                                       | coding (821/1071 nt) | <i>dadX</i> → | alanine racemase 2 |

699

700 **Table S2. Kinetics of DadA with D-alanine and glycine.** Enzyme activity was determined in a DCPIP-coupled assay  
 701 with various substrate concentrations and 60 μg protein for measurements with D-alanine and 280 μg protein for  
 702 measurements with glycine. Data are mean ± SE.

| substrate | DadA                         |                |                                                  |
|-----------|------------------------------|----------------|--------------------------------------------------|
|           | $k_{cat}$ (s <sup>-1</sup> ) | $K_M$ (mM)     | $k_{cat}/K_M$ (M <sup>-1</sup> s <sup>-1</sup> ) |
| D-alanine | 0.81 ± 0.05                  | 1.26 ± 0.26    | 6.42 × 10 <sup>2</sup>                           |
| D-serine  | 0.37 ± 0.02                  | 64.77 ± 9.28   | 5.71 × 10 <sup>0</sup>                           |
| glycine   | 0.17 ± 0.08                  | 617.40 ± 463.2 | 2.75 × 10 <sup>-1</sup>                          |

703

704 **Table S3. Kinetics of BhcA with L-serine and oxaloacetate.** Enzyme activity was determined in an assay coupling  
 705 BhcA dependent L-serine transamination to NADPH dependent hydroxypyruvate reduction by GhrA with varying  
 706 concentrations of L-serine or oxaloacetate for the respective activity measurements. Data are mean  $\pm$  SE.

| substrate    | BhcA                   |                 |                                   |
|--------------|------------------------|-----------------|-----------------------------------|
|              | $k_{cat}$ ( $s^{-1}$ ) | $K_M$ (mM)      | $k_{cat}/K_M$ ( $M^{-1} s^{-1}$ ) |
| L-serine     | $25.87 \pm 0.4$        | $7.01 \pm 0.46$ | $3.7 \times 10^3$                 |
| oxaloacetate | $31.23 \pm 0.89$       | $0.23 \pm 0.03$ | $1.4 \times 10^5$                 |

707

708

709

710 **Table S4. Oligonucleotide primers used.** 'KO' primers were used to amplify the knockout Km cassette from pKD4 with  
 711 50 bp gene-specific upstream and downstream sequences. 'KO-Ver'-primers (knockout-verification) were used to verify  
 712 gene replacement by kanamycin resistance cassette and cassette removal by flippase. External and internal primers  
 713 were used to verify successful removal of the gene from the genome.

| name                     | Sequence (5' $\rightarrow$ 3')                                              | purpose                   |
|--------------------------|-----------------------------------------------------------------------------|---------------------------|
| <i>gdhA</i> -KO-fwd      | TAAACAACATAAGCACAATCGTATTAATATATAAGGGTTTTATATCTATGGTGTAGGCTGGAGC<br>TGCTTC  | Cassette amplification    |
| <i>gdhA</i> -KO-rvs      | TAAGCGTAGCGCCATCAGGCATTTACAACCTAAATCACACCCTGCGCCAGCATATGAATATCCT<br>CCTTAG  | Cassette amplification    |
| <i>gdhA</i> -KO-Ver-fwd  | CTGAGTTATCGCATTGGTTATGAGATTACTCTCG                                          | Gene removal verification |
| <i>gdhA</i> -KO-Ver-rvs  | GGAGCATCATCCGTTAAATACTCATAAACGCCTG                                          | Gene removal verification |
| <i>gdhA</i> -int-fwd     | ATGCATGATCAGACATATTCTCTGGAG                                                 | Gene removal verification |
| <i>gdhA</i> -int-rvs     | TCTAGAGCTAGCTTAAATCACACCCTGCGCC                                             | Gene removal verification |
| <i>gltBD</i> -KO-fwd     | GCGGTTTCGGAAGTGGGGTCCCGCAGAGCCTGGGGGAGGTTACAGATATGGTGTAGGCTGG<br>AGCTGCTTC  | Cassette amplification    |
| <i>gltBD</i> -KO-rvs     | ACAGTCTGGCGAATTCATTGTTACCTCGCTTAAACTTCCAGCCAGTTTCATCATATGAATATCCT<br>CCTTAG | Cassette amplification    |
| <i>gltBD</i> -KO-Ver-fwd | GAGGCGCGCGTATGACACGCAAACC                                                   | Gene removal verification |
| <i>gltBD</i> -KO-Ver-rvs | GCACAATTTATTGAAAATTATCCCTATTATAGGAAAGGTCAAACC                               | Gene removal verification |
| <i>gltBD</i> -int-fwd    | CTGTGCGACAAGCCGAAAA                                                         | Gene removal verification |
| <i>gltBD</i> -int-rvs    | TCGTTCCAGAGTGCAGGAACC                                                       | Gene removal verification |
| <i>putA</i> -KO-Ver-fwd  | GCTGGCGGCGATCAAAGA                                                          | Gene removal verification |
| <i>putA</i> -KO-Ver-rvs  | GCGGTTGCACCTTTCAAAAATGTTAACTG                                               | Gene removal verification |
| <i>putA</i> -int-fwd     | GCAGCGGTATTCACACTCAG                                                        | Gene removal verification |
| <i>putA</i> -int-rvs     | CACACCAGCCATTCTCGAC                                                         | Gene removal verification |
| <i>ybdL</i> -KO-fwd      | TCGTGTTATAGTGCTTCAACACGCAACTTCGTACAGGTACAATAAAAATGGTGTAGGCTGGAG<br>CTGCTTC  | Cassette amplification    |
| <i>ybdL</i> -KO-rvs      | AATATCCCAGCGCTGGACGGTTAAATAGCTAAAGCTGGCGCAGGCGTTCCATATGAATATCC<br>TCCTTAG   | Cassette amplification    |
| <i>ybdL</i> -KO-Ver-fwd  | CTGCAATGACCGCGAAACAA                                                        | Gene removal verification |
| <i>ybdL</i> -KO-Ver-rvs  | TCGTGGACGCCATCAAATCA                                                        | Gene removal verification |
| <i>ybdL</i> -int-fwd     | TTCCACAACCTGGCACCACT                                                        | Gene removal verification |
| <i>ybdL</i> -int-rvs     | ATAACCCACTTCCAGCCGG                                                         | Gene removal verification |
| <i>aspC</i> -KO-fwd      | TTTTCAGCGGGCTTCATTGTTTTTAAATGCTTACAGCACTGCCACAATCGCGTGTAGGCTGGAG<br>CTGCTTC | Cassette amplification    |
| <i>aspC</i> -KO-rvs      | TACCCTGATAGCGGACTTCCCTTCTGTAACCATAATGGAACCTCGTCATGCATATGAATATCCT<br>CCTTAG  | Cassette amplification    |
| <i>aspC</i> -KO-Ver-fwd  | GCCTGCATAATCCCTTCTGCA                                                       | Gene removal verification |
| <i>aspC</i> -KO-Ver-rvs  | GTCTTGCAAAAACAGCCTGCGT                                                      | Gene removal verification |
| <i>aspC</i> -int-fwd     | ATGCATTTTGAGAACATTACCGCCGC                                                  | Gene removal verification |
| <i>aspC</i> -int-rvs     | GCTAGCTCTAGATTACAGCACTGCCACAATCG                                            | Gene removal verification |
| <i>dadX</i> -KO-Ver-fwd  | ACTTTCTGGACTGGTCTGCG                                                        | Gene removal verification |
| <i>dadX</i> -KO-Ver-rvs  | GGTTGCGATGCTTTGCTGAA                                                        | Gene removal verification |
| <i>dadX</i> -int-fwd     | GATACAGGCCAGCCTCGATC                                                        | Gene removal verification |
| <i>dadX</i> -int-rvs     | GGCAAGGCGTTAAATCGACC                                                        | Gene removal verification |
| <i>dadA</i> -KO-fwd      | GATTAGATTATTACTTTTACTGTATCTACCGTTATCGGAGTGGCTATGGTGTAGGCTGGAGC<br>TGCTTC    | Cassette amplification    |
| <i>dadA</i> -KO-rvs      | GCCTGTATCGACGGGTCATCTCGTTTTCTTAGCTGTGTGCCCATGTAACATATGAATATCC<br>TCCTTAG    | Cassette amplification    |
| <i>dadA</i> -KO-Ver-fwd  | GACGCCATATTGCCGAGAGTCAGG                                                    | Gene removal verification |
| <i>dadA</i> -KO-Ver-rvs  | GTCGCGCCTGGCGGACAATG                                                        | Gene removal verification |
| <i>dadA</i> -int-fwd     | CGAGTTGTCATACTGGGAAGTGGTG                                                   | Gene removal verification |
| <i>dadA</i> -int-rvs     | CATTGGGTAAGTGCAGGCCGC                                                       | Gene removal verification |

|                          |                                                                                |                                          |
|--------------------------|--------------------------------------------------------------------------------|------------------------------------------|
| <i>gcvTHP-KO-fwd</i>     | CGCCTTTAGAAAATAGTCGAATCAGTGAATTACTGGTATTCGCTAATCGGAATTAACCCTCACT<br>AAAGGGCG   | Cassette amplification                   |
| <i>gcvTHP-KO-rvs</i>     | AAGGAGAGAGGTTCAACAATTCAGTGCACGTTTCAGGAACCATCGCTCATGTAATACGACTCAC<br>TATAGGGCTC | Cassette amplification                   |
| <i>gcvTHP-KO-Ver-fwd</i> | TCTTCTGCGGGGAGAGGATCA                                                          | Gene removal verification                |
| <i>gcvTHP-KO-Ver-rvs</i> | ACCCTAACCCTCTCCCCAAA                                                           | Gene removal verification                |
| <i>gcvTHP-int-fwd</i>    | CAGCAGCACGTTGAAAAGCT                                                           | Gene removal verification                |
| <i>gcvTHP-int-rvs</i>    | TGGAAGCGGGCATGAATCTT                                                           | Gene removal verification                |
| <i>pZ-ASS-seq-fwd</i>    | GCATTTATCAGGGTTATTGTCTCATG                                                     | Amplification of pZ-ASS-insert           |
| <i>pZ-ASS-seq-rvs</i>    | CTAGGGCGGGCATTTGTCTCTAC                                                        | Amplification of pZ-ASS-insert           |
| <i>Cap-seq-rvs</i>       | CTGAACGGTCTGGTTATAGG                                                           | Amplification of pZ-ASS-insert           |
| <i>alaA-amp_fwd</i>      | CAATGCATCATCACCATCACCCTCCCCATTGAAAAATCCAGCAAATTAGAGAATGTCTG                    | Amplification of <i>alaA</i> from genome |
| <i>alaA-amp_rvs</i>      | GTGCTAGCTCTAGATTACAGCTGATGATAACCAGAAAGGAAACGCGC                                | Amplification of <i>alaA</i> from genome |
| <i>alaC-amp_fwd</i>      | CAATGCATCATCACCATCACCACGCTGACACTCGCCCTGAACGTCG                                 | Amplification of <i>alaC</i> from genome |
| <i>alaC-amp_rvs</i>      | GTGCTAGCTCTAGATTATCCGCGTTTTCGTGAATATGTTTGTCTGCTG                               | Amplification of <i>alaC</i> from genome |

714

715

## 716 Appendix

### 717 Sequences of synthetic genes:

718 *aspA*

719 ATGCATCATCACCATCACCCTCTAACAACATCCGTATCGAAGAAGACCTGCTGGGTACCCGTGAAGTTCCGGCT  
720 GACGCTTACTACGGTGTTCACACCCTGCGTGCTATCGAAAACCTTCTACATCTCTAACAACAAAATCTCTGACATCC  
721 CGGAATTTGTTTCGTGGTATGGTTATGGTTAAAAAAGCTGCTGCTATGGCTAACAAAGAAGCTGCAAACCATCCCGAA  
722 ATCTGTTGCTAACGCTATCATCGCTGCTTGCAGCAAGTTCTGAACAACGGTAAATGTATGGACCAGTTCCCGGTT  
723 GACGTTTACCAGGGTGGTGTCTGGTACCTCTGTTAACATGAACACCAACGAAGTTCTGGCTAACATCGGTCTGGAA  
724 CTGATGGGTACCCAGAAAGGTGAATACCAGTACCTGAACCCGAACGACCACGTTAACAAATGCCAGTCTACCAAC  
725 GACGTTACCCGACCGGTTTCCGTATCGCTGTTTACTCTTCTCTGATCAAACCTGGTTGACGCTATCAACCAGCTGC  
726 GTGAAGGTTTCAACGTAAGCTGTTGAATTTACAGGACATCCTGAAAATGGGTTCGTACCCAGCTGCAAGACGCTG  
727 TTCCGATGACCCTGGGTACAGGAATTTTCGTGCTTTCTCTATCCTGCTGAAAGAAGAAGTTAAAAACATCCAGCGTAC  
728 CGCTGAACTGCTGCTGGAAGTTAACCTGGGTGCTACCGCTATCGGTACCGGTCTGAACACCCCGAAAGAATACTC  
729 TCCGCTGGCTGTTAAAAAAGCTGCTGAAGTTACCGGTTTCCCGTGCCTTCCGGCTGAAGACCTGATCGAAGCTAC  
730 CTCTGACTGCGGTGCTTACGTTATGGTTACGGTGCTCTGAAACGTCTGGCTGTTAAATGTCTAAAATCTGCAAC  
731 GACCTGCGTCTGCTGCTTCTTGTCCGCGTGTGCTGCTGAACGAAATCAACCTGCCGAACTGCAAGCTGGTTCT  
732 TCTATCATGCCGCTAAAGTTAACCCGGTTTCCGGAAGTTGTTAACCAAGTTTGTCTCAAAGTTATCGGTAAACG  
733 ACACCACGTTACCATGGCTGCTGAAGCTGGTACAGCTGCAACTGAACGTTATGGAACCGGTTATCGGTACGGCTA  
734 TGTTCAATCTGTTACATCCTGACCAACGCTTGTACAACTGCTGGAATAATGTATCAACGGTATCACCGCTAA  
735 CAAAGAAGTTTGCAGGTTACGTTTACAACCTATCGGTATCGTTACCTACCTGAACCCGTTTATCGGTACCCAC  
736 AACGGTGACATCGTTGGTAAAATCTGCGCTGAAACCGGTAAATCTGTTCTGTAAGTTGTTCTGGAACGTGGTCTGC  
737 TGACCGAAGCTGAACTGGACGACATCTTCTCTGTTTACAGAACCTGATGCACCCGGCTTACAAAGCTAAACGTTACAC  
738 CGACGAATCTGAACAGTAATCTAGAGCTAGCG

739

740 *BaOAT*

741 ATGCATCATCACCATCACCACCCGTCTTACTCTGTTGCTGAACTGTAACCTACTACCCGGACGAACCGACCGAACCGAAAA  
742 TCTCTACCTCTTCTTACCCGGGTCCGAAAGCTAACAGGAAGCTGGAACCAACTGTCTAACGTTTTTCGACACCCGTGC  
743 TGCTTACCTGCTGGCTGACTACTACAAATCTCGTGGTAACTACATCGTTGACCAGGACGGTAACGTTCTGCTGGAC  
744 GTTTACGCTCAGATCTTCTATCGCTCTGGGTTACAACAACCCGGAATCCTGAAAGTTGCTAAATCTGACGCTA  
745 TGCTGTTGCTCTGGCTAACCGTCCGGCTCTGGCTTGTCTCCCGTCTAACGACTACGGTACGCTGCTGGAAGACG  
746 GTCTGCTGAAAGCTGCTCCGACGGGTACAGGACAAAATCTGGACCGCTCTGTCTGGTTCTGACGCTAACGAAACCG  
747 CTTTCAAAGCTTGCTTACGTACAGGCTGCTAAAAACGTAACGGTCTGTTCTTTCTCTACCGAAGAAGCTGGAATCT  
748 GTTATGGACAACAGCTGCCGGGTACCTCTGAAATGGTTATCTGCTCTTTCGAAAAAGGTTTTCCACGGTCTGCTGT  
749 TCGGTTCTCTGTCTACCACCCGTTCTAAACCGATCCACAACTGGACATCCCGGCTTTCAACTGGCCGAAAGCTCC

750 GTTCCCGGACCTGAAATACCCGCTGGAAGAAAACAAGAAGCTAACAAAGCTGAAGAATCTTCTTGCATCGAAAA  
751 TTCTCTCAGATCGTTCAGGAATGGCAGGGTAAAATCGCTGCTGTTATCATCGAACCGATCCAGTCTGAAGGTGGT  
752 GACAACCACGCTTCTTCTGACTTCTCCAGAACTCGTGAAATCACCATCGAAAACGGTATCCTGATGATCGTTG  
753 ACGAAGTTCAGACCGGTGTTGGTGTACCCGGTAAAATGTGGGCTCACGAACACTGGAACCTGTCTAACCCGCCG  
754 GACCTGGTTACCTTCTCTAAAAAATCCAGGCTGCTGTTTTCTACTACCACGACCCGAAACTGCAACCCGACCAGC  
755 CGTCCGTCAGTTCAACACCTGGTGCAGGTGACCCGCTAAAGCTCTGATCGCTAAAGTTATCTACGAAGAAATCGT  
756 TAAACACGACCTGGTTACCCGTACCCGCTGAAGTTGGTAACTACCTGTTCAACCGTCTGGAAAAACTGTTCAAGGT  
757 AAAAACTACATCCAGAACCCTGCGTGGTAAAGGTCAGGGTACCTACATCGCTTTCGACTTCCGGTACCTCTTCTGAAC  
758 GTGACTCTTTCCTGTCTCGTCTGCGTTGCAACGGTGCTAACGTTGCTGGTTGCGGTGACTCTGCTGTTGCTGCTGC  
759 GTCCGCTCTGACCTTCGAAGAAAAACACGCTGACGTTCTGTTTTCTATCTTCGACAAAACCCTGCGTCAGCTGTA  
760 CGTTAA

761

762 BaPAT

763 ATGCATCATCACCATCACCACAACCAGCCGCTGAACGTTGCTCCGCCGGTTTCTTCTGAACTGAACCTG  
764 CGTGCTCACTGGATGCCGTTCTCTGCTAACCGTAACTTCCAGAAAGACCCGCGTATCATCGTTGCTGCT  
765 GAAGGTTCTTGGCTGACCGACGACAAAGGTCGTAAGTTTACGACTCTCTGTCTGGTCTGTGGACCTG  
766 CGGTGCTGGTCACTCTCGTAAAGAAATCCAGGAAGCTGTTGCTCGTCAGCTGGGTACCCTGGACTACT  
767 CTCGGGTTTCCAGTACGGTACCCGCTGTCTTTCAGCTGGCTGAAAAAATCGCTGGTCTGCTGCCG  
768 GGTGAACTGAACCACGTTTTCTTACCCGTTTCTGGTTCTGAATGCGCTGACACCTCTATCAAATGGCT  
769 CGTGCTTACTGGCGTCTGAAAGGTCAGCCGCAGAAAACCAAACCTGATCGGTGCTGCTGCTGTTACCA  
770 CGGTGTTAACGTTGCTGGTACCTCTCTGGGTGGTATCGGTGGTAACCGTAAAATGTTCCGGTCAGCTGA  
771 TGGACGTTGACCACCTGCCGCACACCCTGCAACCGGGTATGGCTTTCACCCGTGGTATGGCTCAGACC  
772 GGTGGTGTGAACTGGCTAACGAACCTGCTGAACTGATCGAACTGCACGACGCTTCTAACATCGCTGC  
773 TGTTCGTTGAACCGATGTCTGGTTCTGCTGGTGTCTGGTTCCGCCGGTTGGTTACCTGCAACGTCT  
774 GCGTGAATCTGCGACCAGCACAACATCCTGCTGATCTTCGACGAAGTTATCACCGCTTTCGGTCTGCT  
775 GGGTACCTACTCTGGTCTGAATACTTCGGTGTACCCCGGACCTGATGAACGTTGCTAAACAGGTTAC  
776 CAACGGTGCTGTTCCGATGGGTGCTGTTATCGCTTCTTCTGAAATCTACGACACCTTCATGAACCAGGC  
777 TCTGCCGGAACACGCTGTTGAATTTCTCACGGTTACACCTACTCTGCTCACCCGGTTGCTTCCGCTGC  
778 TGGTCTGGCTGCTCTGGACATCCTGGCTCGTGACAACCTGGTTCAGCAGTCTGCTGAACTGGCTCCGC  
779 ACTTCGAAAAAGGTCTGCACGGTCTGCAAGGTGCTAAAAACGTTATCGACATCCGTAACCTGCGGTCTG  
780 GCTGGTGTATCCAGATCGCTCCGCGTGACGGTGACCCGACCGTTTCGTTCCGTTCCGAAGCTGGTATGAA  
781 ACTGTGGCAGCAGGGTTTCTACGTTTCGTTTCGGTGGTGACACCCTGCAATTCGGTCCGACCTTCAACG  
782 CTCGTTCCGGAAGAACTGGACCGTCTGTTTCGACGCTGTTGGTGAAGCTCTGAACGGTATCGCTTAATCT  
783 AGAGCTAGCG  
784

785 LeuDH<sup>B. cereus</sup>

786 ATGCATCATCACCATCACCACACCCTGGAAATCTTCGAATACCTGGAAAAATACGACTACGAACAGGTTGTTTTCT  
787 GCCAGGACAAAGAATCTGGTCTGAAAGCTATCATCGCTATCCACGACACCACCCTGGGTCCGGCTCTGGGTGGTA  
788 CCCGATGTGGACCTACGACTCTGAAGAAGCTGCTATCGAAGACGCTCTGCGTCTGGCTAAAGGTATGACCTACA  
789 AAAACGCTGCTGCTGGTCTGAACCTGGGTGGTGTAAAACCGTTATCATCGGTGACCCGCGTAAAGACAAATCTG  
790 AAGCTATGTTCCGTGCTCTGGGTGTTACATCCAGGGTCTGAACGGTCGTTACATCACCGCTGAAGACGTTGGTA  
791 CCACCGTTGACGACATGGACATCATCCACGAAGAAACCGACTTCGTTACCGGTATCTCTCCGTCTTTCGGTTCTTC  
792 TGTAACCCGCTCTCCGTTACCGTTACGGTGTTCACCGTGGTATGAAAGCTGCTGCTAAAGAAGCTTTCGGTAC  
793 CGACAACCTGGAAGGTAAGTTATCGCTGTTACGGGTGTTGGTAACGTTGCTTACCACCTGTGCAAAACACCTGCA  
794 CGCTGAAGGTGCTAAACTGATCGTTACCGACATCAACAAGAAGCTGTTACGCGTCTGTTGAAGAATTTGGTGT  
795 TCTGCTGTTGAACCGAACGAAATCTACGGTGTGAAATGCGACATCTACGCTCCGTGCGCTCTGGGTGCTACCGTT  
796 AACGACGAAACCATCCCGCAGCTGAAAGCTAAAGTTATCGCTGGTTCTGCTAACAAACAGCTGAAAGAAGACCGT  
797 CACGGTGACATCATCCACGAAATGGGTATCGTTTACGCTCCGGACTACGTTATCAACGCTGGTGGTGTATCAAC  
798 GTTGCTGACGAACTGTACGGTTACAACCGTGAACGTGCTCTGAAACGTGTTGAATCTATCTACGACACCATCGCTA  
799 AAGTTATCGAAATCTCTAAACGTGACGGTATCGCTACCTACGTTGCTGCTGACCGTCTGGCTGAAGAACGTATCGC  
800 TTCTCTGAAAACTCTCGTTCTACCTACCTGCGTAAACGGTACGACATCATCTCTCGTCTGTTAA

801 LeuDH<sup>L. sphaericus</sup>



802 ATGCATCATCACCATCACCACGAAATCTTCAAATACATGGAAAAATACGACTACGAACAGCTGGTTTTCTGCCAGG  
803 ACGAAGCTTCTGGTCTGAAAGCTGTTATCGCTATCCACGACACCACCCTGGGTCCGGCTCTGGGTGGTGCTCGTA  
804 TGTGGACCTACGCTTCTGAAGAAAACGCTGTTGAAGACGCTCTGCGTCTGGCTCGTGGTATGACCTACAAAAACG  
805 CTGCTGCTGGTCTGAACCTGGGTGGTGGTAAAACCGTTATCATCGGTGACCCGTTCAAAGACAAAAACGAAGAAA  
806 TGTCCGCTGCTCTGGGTGCTTTTCATCCAGGGTCTGAACGGTTCGTTACATCACCGCTGAAGACGTTGGTACCACCG  
807 TTACCGACATGGACCTGATCCACGAAGAAACCGACTACGTTACCGGTATCTCTCCGGCTTTTCGGTTCTTCTGGTAA  
808 CCCGCTCCGGTTACCGCTTACGGTGTTCACCGTGGTATGAAAGCTGCTGCTAAAGAAGCTTTTCGGTTCTGAATCT  
809 CTGGAAGGTCTGAAAATCTCTGTTACGGGTCTGGGTAAACGTTGCTTACAAACTGTGCGAATACCTGCACAACGAA  
810 GGTGCTAAACTGGTTGTTACCGACATCAACCAGGCTGCTATCGACCGTGTGTTAACGACTTCGACGCTATCGCT  
811 GTTGCTCCGGACGAAATCTACGCTCAGGAAGTTGACATCTTCTCTCCGTGCGCTCTGGGTGCTATCCTGAACGAC  
812 GAAACCATCCCGCAGCTGAAAGCTAAAGTTATCGCTGGTTCTGCTAACACCAGCTGAAAGACTCTCGTCACGGT  
813 GACTTCCTGCACGAACTGGGTATCGTTTACGCTCCGGACTACGTTATCAACGCTGGTGGTGGTATCAACGTTGCTG  
814 ACGAACTGTACGGTTACAACCGTGAACGTGCTCTGAAACGTGTTGACGGTATCTACGACTCTATCGAAAAAATCTT  
815 CGCTATCTCTAAACGTGACGGTATCCCGACCTACGTTGCTGCTAACCGTCTGGCTGAAGAACGTATCGCTCGTGT  
816 TGCTAAATCTCGTTCTCAGTTCCTGAAAAACGAAAAAACATCCTGCACGGTCGTTAA

817 BhcA

818 ATGCATCATCACCATCACCACACCTCTCAGAACCCGATCTTTCATCCCGGGTCCGACCAACATCCCGGAAGAAATG  
819 CGTAAAGCTGTTGACATGCCGACCATCGACCACCGTTCTCCGGTTTTTCGGTTCGTATGCTGCACCCGGCTCTGGAA  
820 GGTGTTAAAAAAGTTCTGAAAACCAACCCAGGCTCAGGTTTTCTCGTTCCCGTCTACCGGTACCGGTGGTTGGGAA  
821 ACCGCTATCACCACACCCCTGTCTCCGGGTGACAAAGTTCTGGCTGCTCGTAACGGTATGTTCTCTCACCGTTGG  
822 ATCGACATGTGCCAGCGTCACGGTCTGGACGTTACCTTCGTTGAAACCCCGTGGGGTGAAGGTGTTCCGGCTGA  
823 CCGTTTTCGAAGAAATCCTGACCGCTGACAAAGGTCACGAAATCCGTGTTGTTCTGGCTACCCACAACGAAACCGC  
824 TACCGGTGTTAAATCTGACATCGCTGCTGTTTCGTGCTGCTCTGGACGCTGCTAAACACCCGGCTCTGCTGTTTCGTT  
825 GACGGTGTTCCTTCTATCGGTTCTATGGACTTCCGTATGGACGAATGGGGTGTGACATCGCTGTTACCGGTTCTC  
826 AGAAAGTTTTCATGCTGCCGCCGGGTCTGGCTATCGTTGGTTTTCTCTCCGAAAGCTATGGAAGCTGTTGAAACCG  
827 CTCGTCTGCCGCGTACCTTCTTCGACATCCGTGACATGGCTACCGGTTACGCTCGTAACGGTTACCCGTACACCC  
828 CGCCGGTTGGTCTGATCAACGGTCTGAACGCTTCTTGCACGATCCTGGCTGAAGGTCTGGAAAACGTTTTTCG  
829 CTCGTACCAACCGTATCGCTTCTGGTGTTCGTGCTGCTGTTGACGCTTGGGGTCTGAAACTGTGCGCTGTTTCGTC  
830 CGGAACTGTACTCTGACTCTGTTTCTGCTATCCGTGTTCCGGAAGGTTTTCGACGCTAACCTGATCGTTTCTCACGC  
831 TCTGGAAACCTACGACATGGCTTTCCGTACCGGTCTGGGTGAGGTTGCTGGTAAAGTTTTCCGTATCGGTACCT  
832 GGGTTCTCTGACCGACGCTATGGCTCTGTCTGGTATCGCTACCGCTGAAATGGTTATGGCTGACCTGGGTCTGCC  
833 GATCCAGCTGGGTTCTGGTGTTCGTGCTGCTCAGGAACACTACCGTCAGACCACCGCTGCTGCTCAGAAAAAAGC  
834 TGCTTAATCTAGAGCTAGC

835

836 **References**

837

838 Baba T, Ara T, Hasegawa M, Takai Y, Okumura Y, Baba M, Datsenko KA, Tomita M, Wanner BL, Mori H  
839 (2006) Construction of *Escherichia coli* K-12 in-frame, single-gene knockout mutants: the Keio collection.  
840 *Mol Syst Biol* **2**: 2006-2008

841

842 Bennett BD, Kimball EH, Gao M, Osterhout R, Van Dien SJ, Rabinowitz JD (2009) Absolute metabolite  
843 concentrations and implied enzyme active site occupancy in *Escherichia coli*. *Nat Chem Biol* **5**: 593-599

844

845 Bortolotti P, Hennart B, Thieffry C, Jausions G, Faure E, Grandjean T, Thepaut M, Dessein R, Allorge D,  
846 Guery BP, Faure K, Kipnis E, Toussaint B, Le Gouellec A (2016) Tryptophan catabolism in *Pseudomonas*  
847 *aeruginosa* and potential for inter-kingdom relationship. *BMC Microbiol* **16**: 137

848

849 Braatsch S, Helmark S, Kranz H, Koebmann B, Jensen PR (2008) *Escherichia coli* strains with promoter  
850 libraries constructed by Red/ET recombination pave the way for transcriptional fine-tuning. *Biotechniques*  
851 **45**: 335-337

852

853 Datsenko KA, Wanner BL (2000) One-step inactivation of chromosomal genes in *Escherichia coli* K-12  
854 using PCR products. *Proc Natl Acad Sci U S A* **97**: 6640-6645

855

856 Deatherage DE, Barrick JE (2014) Identification of mutations in laboratory-evolved microbes from next-  
857 generation sequencing data using breseq. *Methods Mol Biol* **1151**: 165-188

858

859 Dolzan M, Johansson K, Roig-Zamboni V, Campanacci V, Tegoni M, Schneider G, Cambillau C (2004)  
860 Crystal structure and reactivity of YbdL from *Escherichia coli* identify a methionine aminotransferase  
861 function. *FEBS Lett* **571**: 141-146

862

863 Frank L, Ranhand B (1964) Proline metabolism in *Escherichia coli*: III. The proline catabolic pathway.  
864 *Archives of biochemistry and biophysics* **107**: 325-331

865

866 Franklin FC, Venables WA (1976) Biochemical, genetic, and regulatory studies of alanine catabolism in  
867 *Escherichia coli* K12. *Mol Gen Genet* **149**: 229-237

868

869 Gelfand DH, Steinberg RA (1977) *Escherichia coli* mutants deficient in the aspartate and aromatic amino  
870 acid aminotransferases. *J Bacteriol* **130**: 429-440

871

872 Giavalisco P, Li Y, Matthes A, Eckhardt A, Hubberten HM, Hesse H, Segu S, Hummel J, Köhl K, Willmitzer  
873 L (2011) Elemental formula annotation of polar and lipophilic metabolites using <sup>13</sup>C, <sup>15</sup>N and <sup>34</sup>S isotope  
874 labelling, in combination with high-resolution mass spectrometry. *Plant J* **68**: 364-376

875

876 Grote A, Hiller K, Scheer M, Munch R, Nortemann B, Hempel DC, Jahn D (2005) JCat: a novel tool to adapt  
877 codon usage of a target gene to its potential expression host. *Nucleic Acids Res* **33**: W526-531

878

- 879 Hama H, Sumita Y, Kakutani Y, Tsuda M, Tsuchiya T (1990) Target of serine inhibition in *Escherichia coli*.  
880 *Biochem Biophys Res Commun* **168**: 1211-1216
- 881
- 882 Hayashi H, Inoue K, Nagata T, Kuramitsu S, Kagamiyama H (1993) *Escherichia coli* aromatic amino acid  
883 aminotransferase: characterization and comparison with aspartate aminotransferase. *Biochemistry* **32**:  
884 12229-12239
- 885
- 886 Helling RB (1994) Why does *Escherichia coli* have two primary pathways for synthesis of glutamate? *J*  
887 *Bacteriol* **176**: 4664-4668
- 888
- 889 Inoue K, Kuramitsu S, Aki K, Watanabe Y, Takagi T, Nishigai M, Ikai A, Kagamiyama H (1988) Branched-  
890 chain amino acid aminotransferase of *Escherichia coli*: overproduction and properties. *J Biochem* **104**: 777-  
891 784
- 892
- 893 Jensen SI, Lennen RM, Herrgard MJ, Nielsen AT (2015) Seven gene deletions in seven days: Fast  
894 generation of *Escherichia coli* strains tolerant to acetate and osmotic stress. *Scientific reports* **5**: 17874
- 895
- 896 Ju J, Misono H, Ohnishi K (2005) Directed evolution of bacterial alanine racemases with higher expression  
897 level. *J Biosci Bioeng* **100**: 246-254
- 898
- 899 Kang L, Shaw AC, Xu D, Xia W, Zhang J, Deng J, Woldike HF, Liu Y, Su J (2011) Upregulation of MetC is  
900 essential for D-alanine-independent growth of an *alr/dadX*-deficient *Escherichia coli* strain. *J Bacteriol* **193**:  
901 1098-1106
- 902
- 903 Keseler IM, Gama-Castro S, Mackie A, Billington R, Bonavides-Martinez C, Caspi R, Kothari A,  
904 Krummenacker M, Midford PE, Muniz-Rascado L, Ong WK, Paley S, Santos-Zavaleta A, Subhraveti P,  
905 Tierrafria VH, Wolfe AJ, Collado-Vides J, Paulsen IT, Karp PD (2021) The EcoCyc Database in 2021.  
906 *Frontiers in microbiology* **12**: 711077
- 907
- 908 Kim CH, Hollocher TC (1982) <sup>13</sup>N isotope studies on the pathway of ammonia assimilation in *Bacillus*  
909 *megaterium* and *Escherichia coli*. *J Bacteriol* **151**: 358-366
- 910
- 911 Kim S, Lindner SN, Aslan S, Yishai O, Wenk S, Schann K, Bar-Even A (2020) Growth of *E. coli* on formate  
912 and methanol via the reductive glycine pathway. *Nat Chem Biol* **16**: 538-545
- 913
- 914 Kim SH, Schneider BL, Reitzer L (2010) Genetics and regulation of the major enzymes of alanine synthesis  
915 in *Escherichia coli*. *J Bacteriol* **192**: 5304-5311
- 916
- 917 Kitagawa M, Ara T, Arifuzzaman M, Ioka-Nakamichi T, Inamoto E, Toyonaga H, Mori H (2005) Complete set  
918 of ORF clones of *Escherichia coli* ASKA library ( A Complete Set of *E. coli* K-12 ORF Archive): Unique  
919 Resources for Biological Research. *DNA Research* **12**: 291-299
- 920
- 921 Kumada Y, Benson DR, Hillemann D, Hosted TJ, Rochefort DA, Thompson CJ, Wohlleben W, Tateno Y  
922 (1993) Evolution of the glutamine synthetase gene, one of the oldest existing and functioning genes. *Proc*  
923 *Natl Acad Sci U S A* **90**: 3009-3013

924

925 Kumar R, Shimizu K (2010) Metabolic regulation of *Escherichia coli* and its *gdhA*, *glnL*, *gltB*, D mutants  
926 under different carbon and nitrogen limitations in the continuous culture. *Microb Cell Fact* **9**: 8

927

928 Li H, Zhu D, Hyatt BA, Malik FM, Biehl ER, Hua L (2009) Cloning, protein sequence clarification, and  
929 substrate specificity of a leucine dehydrogenase from *Bacillus sphaericus* ATCC4525. *Appl Biochem*  
930 *Biotechnol* **158**: 343-351

931

932 Löwe H, Kremling A (2021) In-Depth Computational Analysis of Natural and Artificial Carbon Fixation  
933 Pathways. *BioDesign Research* **2021**: 9898316

934

935 Lowe PN, Rowe AF (1985) Aspartate: 2-oxoglutarate aminotransferase from *Trichomonas vaginalis*. Identity  
936 of aspartate aminotransferase and aromatic amino acid aminotransferase. *Biochem J* **232**: 689-695

937

938 Lu J, Zhang Y, Sun D, Jiang W, Wang S, Fang B (2016) The Development of Leucine Dehydrogenase and  
939 Formate Dehydrogenase Bifunctional Enzyme Cascade Improves the Biosynthesis of L-tert-Leucine. *Appl*  
940 *Biochem Biotechnol* **180**: 1180-1195

941

942 Mavrides C (1987) Transamination of aromatic amino acids in *Escherichia coli*. *Methods Enzymol* **142**: 253-  
943 267

944

945 Miller T, E., Beneyton T, Schwander T, Diehl C, Girault M, McLean R, Chotel T, Claus P, Cortina Niña S,  
946 Baret J-C, Erb Tobias J (2020) Light-powered CO<sub>2</sub> fixation in a chloroplast mimic with natural and synthetic  
947 parts. *Science* **368**: 649-654

948

949 Milo R, Phillips R (2015) *Cell biology by the numbers*: Garland Science.

950

951 Moxley MA, Sanyal N, Krishnan N, Tanner JJ, Becker DF (2014) Evidence for hysteretic substrate  
952 channeling in the proline dehydrogenase and Delta<sup>1</sup>-pyrroline-5-carboxylate dehydrogenase coupled  
953 reaction of proline utilization A (PutA). *J Biol Chem* **289**: 3639-3651

954

955 Neidhardt FC, Curtiss IR, Ingraham JL, Lin ECC, Low JKB, Magasanik B, Reznikoff WS, Riley M,  
956 Schaechter M, Umberger HE (1996) *Escherichia coli* and *Salmonella*, *Cellular and Molecular Biology*, 2nd  
957 edn.: ASM Press.

958

959 Newman E, Batist G, Fraser J, Isenberg S, Weyman P, Kapoor V (1976) The use of glycine as nitrogen  
960 source by *Escherichia coli* K12. *Biochimica et Biophysica Acta (BBA)-General Subjects* **421**: 97-105

961

962 O'Neil SR, DeMoss RD (1968) Tryptophan transaminase from *Clostridium sporogenes*. *Arch Biochem*  
963 *Biophys* **127**: 361-369

964

965 Orsi E, Claassens NJ, Nickel PI, Lindner SN (2021) Growth-coupled selection of synthetic modules to  
966 accelerate cell factory development. *Nature communications* **12**: 5295

967

- 968 Pena-Soler E, Fernandez FJ, Lopez-Estepa M, Garces F, Richardson AJ, Quintana JF, Rudd KE, Coll M,  
969 Vega MC (2014) Structural analysis and mutant growth properties reveal distinctive enzymatic and cellular  
970 roles for the three major L-alanine transaminases of *Escherichia coli*. *PLoS One* **9**: e102139
- 971  
972 Powell JT, Morrison JF (1978) The purification and properties of the aspartate aminotransferase and  
973 aromatic-amino-acid aminotransferase from *Escherichia coli*. *Eur J Biochem* **87**: 391-400
- 974  
975 Prieto-Santos MI, Martin-Checa J, Balana-Fouce R, Garrido-Pertierra A (1986) A pathway for putrescine  
976 catabolism in *Escherichia coli*. *Biochim Biophys Acta* **880**: 242-244
- 977  
978 Reitzer L (2003) Nitrogen assimilation and global regulation in *Escherichia coli*. *Annu Rev Microbiol* **57**: 155-  
979 176
- 980  
981 Reitzer L (2014) Amino acid synthesis.
- 982  
983 Sanwal BD, Zink MW (1961) L-Leucine dehydrogenase of *Bacillus cereus*. *Arch Biochem Biophys* **94**: 430-  
984 435
- 985  
986 Sauer U, Canonaco F, Heri S, Perrenoud A, Fischer E (2004) The soluble and membrane-bound  
987 transhydrogenases UdhA and PntAB have divergent functions in NADPH metabolism of *Escherichia coli*. *J*  
988 *Biol Chem* **279**: 6613-6619
- 989  
990 Schada von Borzyskowski L, Severi F, Kruger K, Hermann L, Gilardet A, Sippel F, Pommerenke B, Claus P,  
991 Cortina NS, Glatter T, Zauner S, Zarzycki J, Fuchs BM, Bremer E, Maier UG, Amann RI, Erb TJ (2019)  
992 Marine Proteobacteria metabolize glycolate via the beta-hydroxyaspartate cycle. *Nature* **575**: 500-504
- 993  
994 Schneider BL, Hernandez VJ, Reitzer L (2013) Putrescine catabolism is a metabolic response to several  
995 stresses in *Escherichia coli*. *Mol Microbiol* **88**: 537-550
- 996  
997 Schneider BL, Reitzer L (2012) Pathway and enzyme redundancy in putrescine catabolism in *Escherichia*  
998 *coli*. *J Bacteriol* **194**: 4080-4088
- 999  
1000 Shrawder E, Martinez-Carrion M (1972) Evidence of phenylalanine transaminase activity in the isoenzymes  
1001 of aspartate transaminase. *J Biol Chem* **247**: 2486-2492
- 1002  
1003 Spaans SK, Weusthuis RA, van der Oost J, Kengen SW (2015) NADPH-generating systems in bacteria and  
1004 archaea. *Frontiers in microbiology* **6**: 742
- 1005  
1006 Suzuki S, Yamaguchi J, Tokushige M (1973) Studies on aspartase. I. Purification and molecular properties  
1007 of aspartase from *Escherichia coli*. *Biochim Biophys Acta* **321**: 369-381
- 1008  
1009 Thomason LC, Costantino N, Court DL (2007) E. coli genome manipulation by P1 transduction. *Curr Protoc*  
1010 *Mol Biol* **Chapter 1**: Unit 1 17
- 1011

- 1012 Walsh CT (1989) Enzymes in the D-alanine branch of bacterial cell wall peptidoglycan assembly. *J Biol*  
1013 *Chem* **264**: 2393-2396
- 1014  
1015 Wendisch VF (2020) Metabolic engineering advances and prospects for amino acid production. *Metab Eng*  
1016 **58**: 17-34
- 1017  
1018 Wenk S, Yishai O, Lindner SN, Bar-Even A (2018) An Engineering Approach for Rewiring Microbial  
1019 Metabolism. *Methods Enzymol* **608**: 329-367
- 1020  
1021 Wild J, Hennig J, Lobočka M, Walczak W, Kłopotowski T (1985) Identification of the dadX gene coding for  
1022 the predominant isozyme of alanine racemase in *Escherichia coli* K12. *Mol Gen Genet* **198**: 315-322
- 1023  
1024 Wild J, Kłopotowski T (1981) D-Amino acid dehydrogenase of *Escherichia coli* K12: positive selection of  
1025 mutants defective in enzyme activity and localization of the structural gene. *Mol Gen Genet* **181**: 373-378
- 1026  
1027 Yang Z, Han Y, Ma Y, Chen Q, Zhan Y, Lu W, Cai L, Hou M, Chen S, Yan Y, Lin M (2018) Global  
1028 investigation of an engineered nitrogen-fixing *Escherichia coli* strain reveals regulatory coupling between  
1029 host and heterologous nitrogen-fixation genes. *Scientific reports* **8**: 10928
- 1030  
1031 You L, Page L, Feng X, Berla B, Pakrasi HB, Tang YJ (2012) Metabolic pathway confirmation and discovery  
1032 through <sup>13</sup>C-labeling of proteinogenic amino acids. *Journal of visualized experiments : JoVE* **59**
- 1033  
1034 Zelcbuch L, Antonovsky N, Bar-Even A, Levin-Karp A, Barenholz U, Dayagi M, Liebermeister W, Flamholz  
1035 A, Noor E, Amram S, Brandis A, Bareia T, Yofe I, Jubran H, Milo R (2013) Spanning high-dimensional  
1036 expression space using ribosome-binding site combinatorics. *Nucleic Acids Res* **41**: e98
- 1037  
1038
